**Title:**

**Hyperactive MEK1 signaling in cortical GABAergic interneurons causes embryonic parvalbumin-neuron death and deficits in behavioral inhibition.**

**Authors:**

Michael C. Holter<sup>1</sup>, Lauren T. Hewitt<sup>1,#</sup>, Kenji J. Nishimura<sup>1,#</sup>, George R. Bjorklund<sup>1</sup>, Shiv Shah<sup>1</sup>, Noah R. Fry<sup>1</sup>, Katherina P. Rees<sup>1</sup>, Tanya A. Gupta<sup>2</sup>, Carter W. Daniels<sup>2,†</sup>, Guohui Li<sup>3</sup>, Steven Marsh<sup>4</sup>, David M. Treiman<sup>4</sup>, M. Foster Olive<sup>2</sup>, Trent R. Anderson<sup>3</sup>, Federico Sanabria<sup>2</sup>, William D. Snider<sup>5</sup>, Jason M. Newbern<sup>1,\*</sup>

**Affiliations:**

<sup>1</sup>School of Life Sciences, <sup>2</sup>Department of Psychology, Arizona State University; Tempe, AZ 85287, USA

<sup>3</sup>College of Medicine, University of Arizona; Phoenix, AZ 85004, USA

<sup>4</sup>Barrow Neurological Institute; Phoenix, AZ 85013, USA

<sup>5</sup>University of North Carolina Neuroscience Center, The University of North Carolina School of Medicine; Chapel Hill, NC, 27599, USA

<sup>#</sup>Present Address: Interdepartmental Neuroscience Graduate Program, University of Texas; Austin, TX, 78712, USA

<sup>†</sup>Present Address: Department of Psychiatry, Columbia University, New York, NY 10032, USA

\*Lead Contact/Corresponding Author address:

School of Life Sciences, PO Box 84501

Arizona State University

Tempe, AZ 85287-4501, USA

\*Correspondence: [jason.newbern@asu.edu](mailto:jason.newbern@asu.edu)

## 1 **Highlights**

- 2 • GABAergic-specific MEK1 hyperactivation causes immature parvalbumin neuron death
- 3 • Deletion of *Erk1/2* has no effect on cortical interneuron number
- 4 • Increased MEK1 activity leads to perineuronal net growth and seizure-like activity
- 5 • Behavioral inhibition is disrupted by MEK1 hyperactivation in GABAergic circuits

## 7 **Summary**

8 Abnormal ERK/MAPK pathway activity is a contributor to multiple neurodevelopmental disorders,  
9 especially the RASopathies, which are associated with intellectual disability, ADHD, autism, and epilepsy.  
10 Here, we examined whether ERK/MAPK signaling regulates the development of GABAergic cortical  
11 interneurons (CINs), a heterogeneous population of inhibitory neurons necessary for cortical function. We  
12 show that ERK1/2 is not required for the initial establishment of CIN number. However, hyperactivation  
13 of MEK1 leads to increased caspase-3 activation in the embryonic subpallium and a selective loss of mature  
14 parvalbumin-expressing (PV) CINs. Surviving mutant PV-CINs have a typical fast-spiking phenotype but  
15 display a robust increase in perineuronal net accumulation. Hyperactive MEK1 mutant mice exhibit seizure-  
16 like phenotypes and a reduction in perisomatic inhibitory synapses. We also detected altered PFC  
17 development and impaired behavioral response inhibition in mutants. Our data suggests PV-CIN  
18 development is particularly sensitive to hyperactive MEK1 signaling which may underlie neurological  
19 phenotypes frequently observed in ERK/MAPK-linked syndromes.

20

## 21 **Keywords**

22 ERK1/2, cerebral cortex, development, ganglionic eminence, ADHD, RASopathy, kinase, apoptosis,  
23 response inhibition capacity

## 24 **Introduction**

25 Multiple developmental disorders are caused by genetic mutations linked to perturbation of kinase  
26 activity and altered intracellular signaling. The RAS/RAF/MEK/ERK (ERK/MAPK) pathway is a well-  
27 known, ubiquitous signaling cascade that is dynamically activated during development (Krens et al., 2006;  
28 Samuels et al., 2009). Mutations in classic RAS/MAPK signaling pathway components or upstream  
29 regulators, such as *PTPN11/SHP2*, *NF1*, or *SYNGAP1*, cause a family of related syndromes, known  
30 collectively as the RASopathies (Tidyman and Rauen, 2016). Moreover, *MAPK3/ERK1* is present in a  
31 frequently mutated region of 16p11.2 linked to Autism Spectrum Disorder (ASD) and animal models of  
32 Fragile X, Rett, and Angelmann Syndromes also exhibit changes in ERK/MAPK signaling activity (Kumar  
33 et al., 2008; Pucilowska et al., 2015; Vorstman et al., 2006). These disorders are often associated with  
34 intellectual disability, neurodevelopmental delay, ADHD, autism, and epilepsy. Clearly, aberrant  
35 ERK/MAPK activity is an important molecular mediator of neurodevelopmental abnormalities, however,  
36 therapeutic approaches for these conditions are lacking, due in part to a limited understanding of the  
37 developmental stage- and cell-specific functions of ERK/MAPK signaling in the brain. Delineating the  
38 precise consequences of altered ERK/MAPK activity on specific neuronal subtypes in the developing  
39 forebrain may provide insight into the neuropathogenesis of multiple neurodevelopmental diseases.

40 Coordinated interactions between multiple cell types are necessary for normal brain function, but  
41 deficits in select cellular subtypes often mediate specific neurodevelopmental phenotypes. Past work has  
42 shown that ERK/MAPK signaling regulates the development of dorsal cortex-derived glutamatergic  
43 cortical projection neurons (PNs) and glia (Aoidi et al., 2018; Ehrman et al., 2014; Ishii et al., 2013; Li et  
44 al., 2012). Upstream regulators, such as *Syngap1*, are also crucial for the early development of cortical  
45 glutamatergic neuron structure, excitability, and cognition (Clement et al., 2012; Ozkan et al., 2014). In  
46 contrast, *NF1* mutations have been shown to impair aspects of spatial learning and memory via disruption  
47 of GABAergic, but not glutamatergic, neuron function (Cui et al 2008). Abnormal GABAergic circuitry is  
48 thought to be a key feature in the neuropathogenesis of various other neurodevelopmental disorders (Chao  
49 et al., 2010; Cui et al., 2008; Paluszkiwicz et al., 2011; Zhang et al., 2010). GABAergic neuron-directed

50 *Syngap1* loss modulates GABAergic output but does not drive major abnormalities in mouse behavior or  
51 seizure threshold (Berryer et al., 2016; Ozkan et al., 2014). Mutations in signaling components upstream of  
52 *Ras* differentially modulate multiple downstream pathways and do not provide a clear delineation of  
53 ERK/MAPK function (Anastasaki and Gutmann, 2014; Brown et al., 2012). Here, we have selectively  
54 altered the activation of downstream kinases, MEK1 and ERK1/2, to definitively examine the precise  
55 functions of the core ERK/MAPK cascade in the development of GABAergic cortical interneurons (CINs).

56 In the mature cortex, locally connected parvalbumin- (PV) and somatostatin-expressing (SST)  
57 CINs comprise the most populous and functionally diverse GABAergic subtypes (Kessaris et al., 2014).  
58 Reduced PV-CIN number is often observed in mouse models of multiple neurodevelopmental diseases,  
59 however, the mechanism of loss is poorly understood (Chao et al., 2010; Cui et al., 2008; Steullet et al.,  
60 2017). PV- and SST-CINs are generated in spatiotemporal fashion primarily from the medial ganglionic  
61 eminence (MGE) and migrate tangentially to the cortical plate (Gelman et al., 2009; Gelman and Marín,  
62 2010; Lavdas et al., 1999; Marin and Rubenstein, 2001, 2003; Parnavelas, 2000; Tamamaki et al., 1997;  
63 Wichterle et al., 1999; Wichterle et al., 2001; Wonders and Anderson, 2006). Tangential migration and  
64 early GABAergic circuit development is regulated by BDNF/TRKB, GDNF/GFR $\alpha$ 1, HGF/MET, and  
65 NRG/ERBB4 signaling, which activate multiple Receptor Tyrosine Kinase (RTK)-linked intracellular  
66 kinase cascades, including ERK/MAPK (Bae et al., 2010; Fazzari et al., 2010; Flames et al., 2004;  
67 Perrinjaquet et al., 2011; Pozas and Ibanez, 2005). While the transcriptional basis of GABAergic neuron  
68 development has been well-studied (Lim et al., 2018; Mayer et al., 2018; Mi et al., 2018; Paul et al., 2017),  
69 the kinase cascades that mediate GABAergic development in response to critical extracellular cues have  
70 received less attention.

71 We therefore examined the basic requirements and pathological contributions of ERK/MAPK  
72 signaling to CIN development. We show that ERK1/2 is not required for the early establishment of CIN  
73 number. In contrast, GABAergic-specific overexpression of constitutively-active MEK1 (caMEK1)  
74 resulted in caspase-3 activation in a subset of embryonic GABAergic neurons. Even though caMEK1 is  
75 expressed in all CINs, we only observed a significant reduction in the number of PV-CINs, but not SST-

76 CINs. In contrast with past models exhibiting PV-CIN loss, we found a surprising increase in the extent of  
77 perineuronal net (PNN) accumulation around these cells (Steullet et al., 2017). We also observed an  
78 increased risk of spontaneous epileptiform activity and mild seizure-like activity in a subset of mutant mice  
79 that coincides with a reduction in inhibitory synapses on pyramidal neurons. Mutant mice exhibited normal  
80 locomotor, anxiety-like, and social behaviors, but we noted deficits in behavioral response inhibition  
81 capacity, a process linked to ADHD-like phenotypes. Our findings indicate that GABAergic-specific  
82 MEK1 hyperactivation is sufficient to drive widespread changes in cortical development relevant to  
83 cognitive phenotypes observed in RASopathies. Together, these data define the precise functions of  
84 ERK/MAPK signaling in CIN development and suggest preferential contributions of PV-CIN pathology to  
85 ERK/MAPK-linked disorders.

86

## 87 **Results**

### 88 *Differential expression of ERK/MAPK components in CINs*

89 The ERK/MAPK cascade is a commonly utilized intracellular signaling pathway that is  
90 dynamically activated during embryogenesis and in adulthood. In the embryonic ventricular zone, neural  
91 progenitors typically show high levels of P-ERK1/2 relative to immature post-mitotic neurons (Pucilowska  
92 et al., 2018; Stanco et al., 2014). In adult cortices, elevated P-ERK1/2 labeling is enriched in a  
93 heterogeneous set of excitatory PNs, primarily in layer 2, and plays a critical role in long-range PN  
94 development (Cancedda et al., 2003; Gauthier et al., 2007; Holter et al., 2019; Pham et al., 2004; Pucilowska  
95 et al., 2012; Suzuki et al., 2004; Xing et al., 2016). The activation of ERK1/2 in CINs has not been well  
96 characterized. We generated mice expressing *Slc32A1:Cre* and the Cre-dependent red fluorescent protein  
97 (RFP) reporter, *Ai9* (Madisen et al., 2010; Vong et al., 2011) (Figure 1A-D). As expected, brain regions  
98 abundant with GABA-expressing neurons robustly expressed *Ai9* (Figure 1A). Immunolabeling for  
99 MAP2K1 (MEK1) revealed relatively lower expression in CINs in comparison to NeuN<sup>+</sup>/RFP<sup>-</sup> presumptive  
100 PNs (Figure 1E-G). Layer II/III CINs also expressed low levels of MAPK1/ERK2 in comparison to PNs  
101 (Figure 1H-J). In agreement with previous studies, high levels of P-ERK1/2 were observed in a subset of

102 PNs in cortical layer II/III (Cancedda et al., 2003; Pham et al., 2004; Suzuki et al., 2004). However,  
103 examination of P-ERK1/2 immunolabeling in RFP<sup>+</sup> CINs revealed qualitatively lower levels of P-ERK1/2  
104 in comparison to PNs (Figure 1K-M). In summary, CINs express relatively lower levels of MEK1, ERK2,  
105 and P-ERK1/2 than excitatory neurons in the adult cortex, raising the possibility of functionally distinct  
106 roles for this cascade between these two primary cortical neuron subtypes.

107

### 108 *GABAergic-autonomous caMEK1 expression decreases PV-CIN number*

109 Increased ERK/MAPK signaling is the most common result of RASopathy-linked mutations  
110 (Tidyman and Rauen, 2016). We utilized a Cre-dependent, constitutively active *CAG-Loxp-Stop-Loxp-*  
111 *Mek1*<sup>S217/221E</sup> (*caMek1*) allele, which has been shown to hyperactivate MEK1/2-ERK1/2 signaling (Alessi  
112 et al., 1994; Bueno et al., 2000; Cowley et al., 1994; Klesse et al., 1999; Krenz et al., 2008; Lajiness et al.,  
113 2014; Li et al., 2012). We generated *caMek1, Slc32A1:Cre* mice to hyperactivate MEK1 in a CIN-specific  
114 fashion during embryogenesis. Elevated MEK1 expression was clearly detectable in the E13.5 mantle zone  
115 of the ganglionic eminences, presumptive embryonic CINs migrating into the cortex, and adult CINs in  
116 primary somatosensory cortex (S1) (Figure S1A-H; J-O). *CaMek1, Slc32A1:Cre* mice were viable and  
117 phenotypically normal, though mutants exhibited larger body mass than controls in adulthood (Figure S1I).

118 Surprisingly, assessment of fluorescently-labeled CINs in *caMek1, Slc32A1:Cre, Ai9* sensory  
119 cortices revealed a significant reduction in total RFP<sup>+</sup> cell density (Figure 2A-I). In the adult cortex,  
120 approximately 40% of CINs express PV whereas 30% express SST, which serve as mostly non-overlapping  
121 markers of two distinct populations of CINs (Kelsom and Lu, 2013; Kessaris et al., 2014; Rudy et al., 2011).  
122 Strikingly, we observed a significant reduction in the proportion of PV<sup>+</sup>/RFP<sup>+</sup> CINs, but not in the  
123 proportion of SST<sup>+</sup>/RFP<sup>+</sup> CINs (Figure 2K-Q). PV, but not SST, expressing CINs displayed a significant  
124 increase in somal area compared to control neurons (Figure 2R-U, V). A reduced density of PV-CINs was  
125 detected in a separate *caMek1, Dlx5/6:Cre* strain that also targets postmitotic CINs in the developing cortex  
126 (Figure S2A-D) (Monory et al., 2006).

127           Recombination within the entire GABAergic system raises the possibility that indirect changes in  
128 other neuroanatomical regions could alter global cortical activity and modulate PV-CIN number (Denaxa  
129 et al., 2018). To restrict Cre expression to primarily MGE-derived CINs, we generated *caMek1, Nkx2.1:Cre*  
130 mice and assessed the proportion of PV<sup>+</sup>/RFP<sup>+</sup> CINs. *CaMek1, Nkx2.1:Cre* mice exhibited generalized  
131 growth delay in the second-third postnatal week and were not viable past the first postnatal month (n=8).  
132 Nonetheless, consistent with our previous findings, P14 *caMek1, Nkx2.1:Cre, Ai9* mice displayed a  
133 reduction in PV<sup>+</sup>/RFP<sup>+</sup>-CIN density (Figure S2E-L, M). In summary, our data indicate that the  
134 establishment of PV-CIN number is cell-autonomously vulnerable to enhanced MEK1 signaling, while  
135 SST-CIN number is not altered.

136

### 137 *Reduced ERK/MAPK signaling does not alter CIN density*

138           ERK/MAPK activity is necessary for the survival and physiological maturation of select dorsal  
139 cortex-derived PNs (Li et al., 2012; Xing et al., 2016), but it is unclear if ERK/MAPK is necessary for the  
140 establishment of CIN number *in vivo*. We therefore generated quadruple transgenic mice that express  
141 germline *Mapk3/Erk1*<sup>-/-</sup> null alleles (*Erk1*<sup>-/-</sup>), conditional inactivating *Mapk1/Erk2* alleles (*Erk2*<sup>fl/fl</sup>),  
142 *Slc32A1:Cre*<sup>+/-</sup>, and *Ai9*<sup>+/-</sup> (Newbern et al., 2009; Xing et al., 2016). *Erk1*<sup>-/-</sup>, *Erk2*<sup>fl/fl</sup>, *Slc32A1:Cre, Ai9*  
143 mice were born at normal Mendelian ratios, but exhibited profound growth delay by the end of the first  
144 postnatal week and lethality in the second to third postnatal week (n=10). No gross neuroanatomical  
145 abnormalities between mutant and control forebrains were observed in the first postnatal week (Figure 3A-  
146 B). ERK2 immunolabeling confirmed a reduction of ERK2 protein in mutant CINs in layer 5 in comparison  
147 to controls (Figure 3C-H). Surprisingly, no significant difference in the relative density of RFP<sup>+</sup> CINs was  
148 observed between mutant and control cortices (Figure 3I-L, M). Similar results were obtained in *Erk1*<sup>-/-</sup>,  
149 *Erk2*<sup>fl/fl</sup>, *Dlx5/6:Cre, Ai3* mice (Supplemental Figure 3A-D). Early growth delay and lethality limited further  
150 assessment of GABAergic maturation and subtype specification. Nonetheless, these data reveal that  
151 ERK/MAPK signaling is dispensable for the establishment of CIN number through the first postnatal week.

152

153 *Presumptive PV-CINs in the embryonic subpallium undergo cleaved caspase 3-mediated apoptosis*

154 CIN number is refined by activity-dependent programmed cell death at the end of the first postnatal  
155 week (Southwell et al., 2012). However, our analyses of RFP<sup>+</sup> CINs in P3.5 S1 yielded a significant  
156 reduction in CIN density. We therefore hypothesized that gain-of-function MEK1 signaling disrupted  
157 embryonic processes necessary to establish CIN number. Indeed, examination of RFP<sup>+</sup> CIN density in the  
158 E17.5 cortical plate also revealed fewer CINs in *caMek1*, *Slc32A1:Cre* embryos (Figure S4A-D). Thus, we  
159 examined the possibility of CIN death during mid-neurogenesis in the *caMek1*, *Slc32A1:Cre*, *Ai9*  
160 subpallium. Immunolabeling for the apoptotic marker cleaved caspase 3 (CC3) revealed colocalization of  
161 CC3 with some RFP<sup>+</sup> neurons within the mantle zone of the ganglionic eminences in E13.5 mutant, but not  
162 control, embryos (Figure 4A-E, F). CC3<sup>+</sup>/RFP<sup>+</sup> neurons also presented with condensed, pyknotic nuclei  
163 (Figure 4G-N). We also observed CC3<sup>+</sup>/RFP<sup>+</sup> cells with pyknotic nuclei in *caMek1*, *Nkx2.1:Cre*, *Ai9* mantle  
164 zone (Figure 4O-Q). No apoptotic cells were observed in the mutant ganglionic eminence VZ or the cortical  
165 migratory streams (data not shown). Analysis of recombined GABAergic neuron density in the dorsal  
166 striatum did not reveal a significant difference from controls, suggesting that the loss of PV-CINs is not  
167 due to altered CIN migratory trajectory (data not shown). Together, our results suggest reduced PV-CIN  
168 density in the postnatal cortex is due to the death of a subset of migrating CINs in the ganglionic eminence.  
169

170 *GABAergic-specific caMek1 promotes cortical hyperexcitability but does not significantly alter fast-spiking*  
171 *CIN electrophysiological properties*

172 As many as 40% of RASopathy individuals experience seizures and epilepsy is prominent in  
173 individuals with mutations downstream of *Ras* (Digilio et al., 2011; Rauen et al., 2013; Yoon et al., 2007).  
174 Whether MEK1 hyperactivation in GABAergic circuits mediates seizure activity in the RASopathies has  
175 not been explored. We did not detect any signs of overt generalized tonic-clonic seizures while housed in  
176 home cages. We conducted a series of behavioral tests by first using the open field, then the elevated plus  
177 maze, and finally the social approach assay. No difference in global locomotor activity, anxiety-like  
178 behavior, or sociability could be detected in these tests (Figure S5). However, during the initial 60 sec of



179 open field testing with 13 adult *caMek1, Slc32A1:Cre* mutants, two mutant mice exhibited increased head  
180 twitching, aberrant locomotor activity, and increased rearing (Supp. Video 1) and three mutant mice  
181 displayed periods of overt sudden behavioral arrest and motionless staring (Supp Video 2). These behaviors  
182 were not observed in any of the control mice utilized in this study. Consistent with these subtle impairments,  
183 subsequent re-analysis of the first 10 sec of the open field task revealed a significant reduction in distance  
184 traveled in *caMek1, Slc32A1:Cre* mutants, which was also observed in *caMek1, Dlx5/6:Cre* mutants (data  
185 not shown).

186 We performed intracortical EEG recordings to directly assess cortical activity, which revealed  
187 spontaneous epileptiform-like discharges in three of six *caMek1, Slc32A1:Cre* adult mice, but not control  
188 mice (Figure 5A). These six mutants also exhibited a significantly reduced threshold to seizure induction  
189 in response to pentylenetetrazol (PTZ) administration when compared to controls (Figure 5B). Seizures  
190 have been shown to increase the local expression of glial fibrillary acidic protein (GFAP) in astrocytes  
191 (Steward et al., 1992; Stringer, 1996). Indeed, 3 of 3 newly generated and untreated *caMek1 Slc32A1:Cre*  
192 mice immunolabeled for GFAP exhibited clusters of GFAP-expressing astrocytes in the cortex consistent  
193 with local reactive astrogliosis near hyperexcitable regions (Figure 5C-F). Overall, many of the seizure-  
194 related phenotypes we observed were not completely penetrant, thus, these data indicate that MEK1  
195 hyperactivation in CINs may be a potential risk factor for epilepsy in the RASopathies.

196 PV-CINs provide a powerful source of inhibition in the cortex, firing action potentials at  
197 frequencies greater than 200Hz (Okaty et al., 2009). Fast-spiking (FS) physiology is due in part to the  
198 unique expression of the fast-inactivating potassium channel Kv3.1, which begins in the second postnatal  
199 week (Goldberg et al., 2011; Rosato-Siri et al., 2015; Rudy and McBain, 2001). To determine if hyperactive  
200 MEK1 signaling was sufficient to alter basic physiological properties of FS CINs, we performed whole-  
201 cell patch clamp recordings on *caMek1, Nkx2.1:Cre* mice at the end of the third postnatal week. Current  
202 clamp recordings of fluorescently-labeled CINs revealed that both control and mutant neurons retained their  
203 distinctive electrophysiological fast-spiking phenotype (Figure 5G, I) (Agmon & Connors, 2018; Anderson  
204 et al., 2010; McCormick et al., 1985). No significant differences were observed in resting membrane

205 potential, adaptation index, rheobase, or action potential threshold, but a small increase in action potential  
206 amplitude was observed (Figure 5I). We did also detect a significant increase in FS CIN input resistance  
207 and a reduction in FI slope in *caMek1, Nkx2.1:Cre* mutant compared with *Nkx2.1:Cre* controls suggesting  
208 that mutants may have a reduction in the responsiveness and/or firing output of inhibitory neurons (Figure  
209 5H-I). Overall, these data indicate that canonical electrophysiological features of fast-spiking CIN  
210 development were not altered by MEK1 hyperactivation. However, certain intrinsic properties exhibit  
211 subtle differences in mutant mice that might contribute to circuit-wide hyperexcitability.

212

### 213 *Reduced perisomatic GABAergic innervation of layer 2/3 pyramidal neuron cell soma*

214 PV-expressing CINs preferentially innervate pyramidal cells, where synaptic targets are dependent  
215 on PV-CIN morphology (Chattopadhyaya et al., 2004; Chattopadhyaya et al., 2007). Basket cells often  
216 innervate the PN soma, whereas chandelier cells target the PN axon initial segment (Chattopadhyaya et al.,  
217 2004; Chattopadhyaya et al., 2007; Fino et al., 2013). We examined perisomatic VGAT-expressing  
218 synapses surrounding layer 2/3 PNs in adult *caMek1, Slc32A1:Cre, Ai3* mice. We found the extent of  
219 VGAT-immunolabeling in the perisomatic space of NeuN<sup>+</sup>/GFP<sup>-</sup> PN soma was significantly reduced in  
220 mutant cortices when compared to controls (Fig. 6A-F, K). Interestingly, the area of VGAT-labeling in the  
221 surrounding neuropil, typically innervated by SST-CINs, was unchanged (Fig. 6G-J, K). These data show  
222 that PV-CIN inhibitory output is selectively vulnerable to caMEK1 signaling while SST-CINs are less  
223 affected.

224

### 225 *Surviving PV-CINs exhibit enhanced perineuronal net accumulation*

226 PV-CINs selectively accumulate an extracellular structure called the perineuronal net (PNN)  
227 derived primarily from glial chondroitin sulfate proteoglycans (CSPGs). PNNs are essential to cortical  
228 development, marking the closure of critical periods and protecting PV-CINs from the high level of  
229 oxidative stress associated with a high frequency firing rate (Cabungcal et al., 2013; Hensch, 2005b).  
230 Reductions in PNN formation have been noted in multiple models of neurodevelopmental disorders, many

231 of which also exhibit a coincident loss of PV-CINs (Bitanhirwe and Woo, 2014; Cabungcal et al., 2013;  
232 Krencik et al., 2015; Krishnan et al., 2015; Steullet et al., 2017).

233 We utilized WFA-labeling to study PNN formation in adult *caMek1*, *Slc32A1:Cre*, *Ai3* mice  
234 (Figure 7A-F). We found that all surviving PV-CINs were WFA<sup>+</sup> in mutants; PNNs were not detected on  
235 *Ai3*-expressing neurons that lacked PV-expression. Analysis of the quantitative level of WFA-labeling in  
236 mutant PV-CINs revealed a robust increase in PNN accumulation as compared to controls (Figure 7C-F,  
237 H). In agreement with the larger somal size of mutant PV-CINs, the cross-sectional area of WFA-labeled  
238 profiles was significantly increased (Figure 7G). Interestingly, mutant WFA-labeled CINs exhibited normal  
239 expression of 8-oxo-2'-deoxyguanosine (8-oxo-dg), a marker of DNA oxidation often altered in neurons  
240 with reduced PNNs (Figure 7I-L) (Steullet et al., 2017). Collectively, MEK1 hyperactivation does not  
241 trigger PNN formation on GABAergic neurons lacking PV, but clearly increases PNN accumulation.

242

#### 243 *caMek1*, *Slc32A1:Cre* mice display delayed acquisition of FMI performance

244 Attention deficit hyperactivity disorder (ADHD) is a major co-morbid condition associated with a  
245 significant proportion of RASopathy cases (Adviento et al., 2014; Garg et al., 2013; Green et al., 2017;  
246 Pierpont et al., 2018; Walsh et al., 2013). Inappropriate prefrontal cortex (PFC) function has been  
247 implicated in ADHD (Gabay et al., 2018), and has been shown to contribute to cognitive deficits in a mouse  
248 model of Fragile X Syndrome (Krueger et al., 2011). Few studies have examined GABAergic contributions  
249 to PFC function, particularly in the context of RASopathies. As in sensory cortex, we noted a reduction in  
250 *Ai9*-expressing CINs in the PFC of mutant mice (Figure 8A-B, D-E). Interestingly, we found that PNs in  
251 the PFC exhibit reduced P-ERK1/2 expression in *caMek1*, *Slc32A1:Cre* mice (Figure 8A-F). These data  
252 indicate that MEK1 hyperactivation in developing CINs is sufficient to drive molecular abnormalities  
253 within specific cortical regions important for cognition.

254 Individuals with ADHD often exhibit structural changes in the PFC, which appear to be involved  
255 in the inhibition of reinforced responses (Seidman et al., 2006). To examine response inhibition directly,  
256 we utilized a fixed minimum interval (FMI) test, a timing-based task that requires animals to withhold a

257 response for a fixed period. This paradigm is perhaps more favorable than the five-choice serial reaction  
258 time task (5-CSRTT) and differential reinforcement of low rates task (DRL), because its self-paced design  
259 dissociates response inhibition capacity from motivational aspects of behavior (Bizarro et al., 2003;  
260 Doughty and Richards, 2002; Hill et al., 2012; Watterson et al., 2015). Here, adult control and *caMek1*,  
261 *Slc32A1:Cre* mice were trained to initiate trials via a nose-poke which resulted in the presentation of  
262 sweetened condensed milk in the reward receptacle. Mice were then placed on an FMI schedule, where a  
263 time delay between the initiating nose-poke and the availability of reinforcement in the reward receptacle  
264 was implemented (Figure 8G). Reward was delivered only if the time between the initiating nose-poke and  
265 attempt to obtain reward (inter-response time, or IRT) exceeded a pre-determined withholding period. If  
266 mice prematurely accessed the reward receptacle, no reward was delivered.

267       Following initial training on a FMI with a very short (0.5s) response-withholding period, we  
268 measured mouse performance when the withholding period was extended to 2s, 4s, and finally, 8s. We  
269 observed a main effect of FMI schedule irrespective of genotype, such that IRTs increased as the FMI  
270 withholding period increased ( $F(2, 62) = 535.12, p < 0.01$ ). Importantly, mutants showed clear evidence  
271 of impaired acquisition of the FMI task. We found a main effect of genotype on the mean median IRT  
272 during the first 5 days of each FMI schedule (acquisition period), in which mutant mice had relatively lower  
273 IRTs compared to control mice ( $F(1, 62) = 18.73, p < 0.01$ ) (Figure 8H). In further support of reduced  
274 response inhibition capacity, mutant mice exhibited increased variability in their IRTs as measured by the  
275 coefficient of quartile variation (CQV) during acquisition ( $F(1, 62) = 31.73, p < 0.01$ ) and asymptotic  
276 performance (defined as the last five days of the FMI) ( $F(2, 62) = 5.055, p < 0.001$ ) across all schedules  
277 (Figure 8I). Median IRTs during the asymptotic phase in mutants and controls were not statistically  
278 different in any schedule (Figure 8H inset). Thus, these data suggest that mutant mice are capable of  
279 learning to inhibit reinforced responses for up to 4 s but show a significant delay in acquiring this capability.

280       Due to *Slc32A1:Cre*-mediated recombination within subcortical circuitry, it is possible that altered  
281 reward pathway activity influenced FMI performance. The latency to initiate (LTI) a trial provides a  
282 measure of motivation; for example, rats administered amphetamine show a reduction in LTI in a related

283 task (Rojas-Leguizamón et al., 2018). However, we noted that mutants did not differ from controls in the  
284 median LTI at 2s and 4s, indicating that motivation to obtain rewards was not significantly altered between  
285 conditions (Tukey's b post-hoc test - 2s:  $t(21) = 1.39$ ,  $p=0.18$ ; 4s:  $t(21) = -0.29$ ,  $p=0.77$ ) (Figure 8J). We  
286 found that during the 8s FMI, mutant mice exhibited a statistically significant increase in LTI ( $t(20) = 2.43$ ,  
287  $p < 0.05$ ). This apparent loss of motivation is likely due to the fact that the mean median asymptotic IRT  
288 did not reach the 8s criterion even after 32 days of testing (control:  $8.45s \pm 1.04$ ; mutant:  $7.26s \pm 1.09$ ) and  
289 is also consistent with the statistically significant reduction in mean obtained reinforcers at the 8s FMI  
290 (Figure 8K). Collectively, our data indicate that altered GABAergic circuitry regulates acquisition of  
291 response inhibition capacity in mice and may contribute to ADHD phenotypes associated with the  
292 RASopathies.

293

294

## 295 **Discussion**

296 Here, we show that GABAergic neuron-autonomous MEK1 hyperactivation causes the death of a  
297 subset of immature GABAergic neurons in the embryonic subpallium and is associated with a selective  
298 reduction in PV-CIN density, but not SST-CINs, in adulthood. We observed a significant reduction in  
299 perisomatic GABAergic synapses on layer 2/3 PNs and forebrain hyperexcitability, but a surprising  
300 increase in the extent of PNN accumulation in mutant PV-CINs. While mutants displayed relatively normal  
301 performance in assays of locomotion, sociability, and anxiety, we found notable defects in acquisition of  
302 behavioral response inhibition capacity, which has been linked to ADHD. These data suggest that  
303 GABAergic neuron-autonomous MEK1 hyperactivation, but not loss of ERK1/2, selectively regulates  
304 embryonic PV-CIN survival and is an important contributor to seizure risk and cognitive deficits in the  
305 RASopathies.

306 While expression of ERK/MAPK pathway components is widespread, our findings reinforce the  
307 notion that expression levels are variable, and activation of this cascade is highly cell-type dependent. Cell-  
308 specific transcriptomic experiments have reported that RNA levels of *Mapk1/Erk2* and *Map2k1/Mek1*, but

309 not *Mapk3/Erk1* or *Map2k2/Mek2*, are lower in CINs relative to PNs (Mardinly et al., 2016). We have  
310 extended these findings to show that protein levels of MAPK1/ERK2 and MAP2K1/MEK1 are lower in  
311 CINs than in surrounding PNs. Reduced expression of pan-ERK/MAPK components may contribute to the  
312 typically low levels of phosphorylated ERK1/2 in CINs. A more stringent degree of ERK/MAPK  
313 recruitment is expected to limit activity-dependent transcription in CINs, indeed, the experience-dependent  
314 transcriptional response in V1 PV-CINs is significantly smaller relative to PNs (Hrvatín et al., 2018).  
315 Further analysis of activity-dependent transcription in CINs of ERK/MAPK-mutant mice may reveal how  
316 CIN-specific functional properties are encoded (Tyssowski et al., 2018).

317         Given the reduced level of ERK/MAPK signaling in CINs, it is perhaps not surprising that loss of  
318 ERK1/2 did not significantly alter GABAergic neuron migration or the establishment of CIN number. This  
319 contrasts with the significant neuronal death that occurs by P4 in cortical layer 5 when ERK1/2 is deleted  
320 in developing excitatory neurons (Xing et al., 2016). These data also indicate that BDNF, GDNF, and NRG1  
321 regulate early GABAergic migration and differentiation via ERK/MAPK independent cascades (Bae et al.,  
322 2010; Fazzari et al., 2010; Flames et al., 2004; Perrinjaquet et al., 2011; Pozas and Ibanez, 2005). Notably,  
323 the early lethality of *Erk1*<sup>-/-</sup>, *Erk2*<sup>fl/fl</sup>, *Slc32A1:Cre* mutants significantly limited the extent of our analysis,  
324 but points to a critical requirement for ERK1/2 in the function or development of an as yet unidentified  
325 GABAergic population. The use of a Cre-line with better specificity for developing CINs may help provide  
326 a more comprehensive understanding of ERK1/2 function during later, activity-dependent stages of  
327 GABAergic circuit development. In addition, the degradation of ERK2 following Cre-mediated gene  
328 recombination is likely prolonged relative to ectopic overexpression of caMEK1 under the control of a  
329 strong CAG promoter. Thus, at very early stages of GABAergic development it may be difficult to directly  
330 compare cellular mechanisms between these two strains.

331         Defects in GABAergic circuitry have been implicated in pathogenesis of Rett, Fragile X,  
332 schizophrenia and many other neurodevelopmental diseases (Chao et al., 2010; Cui et al., 2008; Steullet et  
333 al., 2017). Reduced PV-CIN number is often observed, however, the mechanism of loss is poorly  
334 understood. In our study, we show that increased MEK1 signaling is sufficient to disrupt the establishment

335 of CIN number during embryogenesis. We demonstrate that MEK1 hyperactivation drives the GABAergic-  
336 neuron autonomous activation of caspase-3 and death of a subset of immature neurons in the embryonic  
337 ganglionic eminences. The selective reduction in PV-CIN density in the postnatal cortex suggests these  
338 early dying neurons were committed to the PV lineage. The death of this specific subset of GABAergic  
339 neurons occurs much earlier than the typical period of programmed cell death for CINs (Denaxa et al.,  
340 2018; Southwell et al., 2012). Notably, *caMek1* expression in cortical excitatory neurons is not associated  
341 with significant neuronal loss during development (Nateri et al., 2007; Xing et al., 2016). Though  
342 ERK/MAPK typically acts as a promoter of cell survival, apoptotic death by sustained ERK/MAPK activity  
343 has been described in certain contexts (Cagnol and Chambard, 2010; Martin and Pognonec, 2010). It will  
344 be important to evaluate whether treatment with pharmacological MEK1/2 inhibitors or antioxidants during  
345 embryogenesis is capable of sustained restoration of CIN number in *caMek1*, *Slc32A1:Cre* mice. PV-CIN  
346 sensitivity to MEK1 hyperactivation may not only be an important factor in RASopathy neuropathology,  
347 but could be a relevant mechanism in other conditions that involve indirect activation of ERK/MAPK  
348 signaling during embryogenesis, such as schizophrenia, Fragile X Syndrome, or prenatal stress (Fowke et  
349 al., 2018).

350         Recent scRNAseq analyses suggest the mature transcriptional signature of cardinal CIN subtypes  
351 is not fully specified until CINs migrate into the cortex (Mayer et al., 2018; Paul et al., 2017; Sandberg et  
352 al., 2018). MEF2C, a known substrate of ERK1/2 and p38 signaling, was identified as a transcription factor  
353 expressed early in the presumptive PV lineage, the deletion of which also leads to the selective reduction  
354 of PV-CINs (Mayer et al., 2018). Consistent with past in situ data, we found that MEF2C immunolabeled  
355 cells were present in the cortex and ventro-lateral regions of the E13.5 subpallium in wild-type mice, but  
356 not in the proximal regions of the subpallial mantle zone where cleaved caspase-3<sup>+</sup> GABAergic neurons  
357 were observed in mutants (data not shown) (Mattar et al., 2008). Thus, regulation of MEF2C seems unlikely  
358 to mediate early GABAergic neuron apoptosis in *caMEK1* mutants. While further research is necessary,  
359 the selective vulnerability of presumptive PV-CINs to hyperactive MEK1 signaling may not be dependent  
360 upon a specific downstream transcriptional target. Compared to transcriptional networks, less is known

361 regarding the function of many post-translational modifications during CIN specification. Our data hint at  
362 selective roles for kinase signaling networks at an early stage of CIN lineage differentiation.

363 Despite the effect of *caMEK1* on early GABAergic neuron survival, the physiological maturation  
364 of mature *caMek1*-expressing PV-CINs was not significantly impeded. Surviving PV-CINs retained a  
365 characteristic fast-spiking signature with only minor differences in intrinsic electrophysiological  
366 parameters. We noted a modest, but statistically significant decrease in perisomatic inhibitory synapse  
367 number on cortical PNs in mutant mice. As might be expected, a subset of mutant animals exhibited  
368 forebrain hyperexcitability and sudden behavioral arrest similar to that reported in animal models of mild  
369 seizures. Overexpression of a similar *caMek1* mutation with *CamKII:Cre* has also been shown to cause  
370 seizure-like activity (Nateri et al., 2007). Overall, our findings indicate that MEK1 hyperactivation in  
371 GABAergic neurons could increase the risk of epilepsy seen in RASopathies.

372 The PNN is a critically important structure involved in the maturation of cortical circuitry with an  
373 important role in protecting PV-CINs from oxidative stress and limiting synaptic plasticity (Cabungcal et  
374 al., 2013; Hensch, 2005a; Hensch, 2005b; Morishita et al., 2015). Mouse models of schizophrenia, Fragile  
375 X, and ASDs often exhibit reduced PV-CIN number and typically display a reduction in PNN formation  
376 (Steullet et al., 2017). In contrast to these disorders, PNNs appear to respond differently to RASopathy  
377 mutations. PV-CINs accumulate extracellular PNNs derived primarily from astrocyte-produced CSPGs  
378 (Galtrey and Fawcett, 2007; Sorg et al., 2016). RASopathic astrocytes upregulate secreted ECM-associated  
379 CSPGs and promote an increase in the extent of PNN accumulation around PV-CINs (Krencik et al., 2015).  
380 Our data is the first to indicate a PV-CIN autonomous role for enhanced PNN accumulation in response to  
381 MEK1 hyperactivation. It is thought that increased PNN accumulation on PV-CINs limits the plasticity of  
382 cortical regions (Pizzorusso et al., 2002). Modification of PNN levels may serve as a useful therapeutic  
383 strategy for the impaired cognitive function and intellectual disability frequently reported in RASopathy  
384 individuals (Tidyman and Rauen, 2016).

385 In addition to intellectual disability, ADHD is frequently diagnosed in Noonan Syndrome and NF1,  
386 two common RASopathies (Johnson et al., 2019; Miguel et al., 2015; Pierpont et al., 2015). Abnormal PFC



387 function has been linked to ADHD (Seidman et al., 2006). Interestingly, we detected significantly reduced  
388 P-ERK1/2 levels in PFC PNs of mutant mice, suggesting that RASopathic CINs may alter the global  
389 development and function of this brain region. GABAergic signaling is known to be necessary for cortical  
390 circuit maturation and MEK1 hyperactivation in CINs appears to be sufficient to disrupt PFC circuit  
391 function (Cancedda et al., 2007). We further examined ADHD-related behavioral phenotypes in *caMek1*,  
392 *Slc32A1:Cre* mice by assessing behavioral response inhibition capacity with a fixed-minimum interval  
393 (FMI) based task (Rojas-Leguizamón et al., 2018; Watterson et al., 2015). We detected significant deficits  
394 in the acquisition of response inhibition dependent behaviors in mutant mice relative to controls. It is  
395 plausible that FMI defects in caMEK1 mutants is due to the reduced plasticity of PFC GABAergic circuitry  
396 in response to heightened levels of PNN or GABAergic-dependent changes in PN development. Our data  
397 show that GABAergic-directed MEK1 hyperactivation is sufficient to drive deficits in behavioral response  
398 inhibition possibly associated with ADHD.

399         Mutations in ‘upstream’ RASopathy genes modulate a much broader set of downstream cascades  
400 when compared to mutations in *Raf* or *Mek1/2*. *Nf1*, *Ptpn11/Shp2*, and *Syngap1* mutations result in a  
401 complex constellation of cellular changes, some of which depend upon ERK/MAPK modulation, whereas  
402 others involve different signaling cascades (Anastasaki and Gutmann, 2014; Brown et al., 2012). In  
403 combination with the findings of (Angara et al., 2019, co-submitted), it is clear that PV-CIN development  
404 is particularly sensitive to convergent signaling via NF1 and ERK/MAPK. Additional studies of human  
405 samples will be necessary to determine whether defective GABAergic circuits are a component of  
406 RASopathy pathogenesis. Collectively, our research suggests that hyperactivation of MEK1 in GABAergic  
407 neurons represents an important candidate mechanism for epilepsy and cognitive defects in RASopathic  
408 individuals.

409 **Acknowledgements**

410 We would like to thank Johan Martinez, Sam Lusk, Julia Pringle, Anna Kreuger, Sarah Sparks, Katie  
411 Riordan, Danielle Gonzalez, Elise Bouchal, and Kimberly Holter for their technical contributions to this  
412 work. This research is supported by National Institute of Health grants R00NS076661 and R01NS097537  
413 awarded to JMN, R01NS087031 awarded to TRA, and R01NS031768 to WDS.

414

415 **Author Contributions**

416 Conceptualization, J.M.N, W.D.S, M.C.H, C.W.D, F.S., T.R.A.; Methodology, J.M.N, W.D.S, M.C.H,  
417 C.W.D, F.S., T.R.A., S.M., D.M.T.; Investigation, J.M.N, W.D.S, M.C.H, L.T.H., K.N., G.R.B., S.S.,  
418 N.R.F., K.P.R., T.A.G., G.L., M.F.O., C.W.D, F.S., T.R.A., S.M., D.M.T.; Writing – Original Draft,  
419 M.C.H., J.M.N., C.W.D., T.A.G., F.S., T.R.A., S.M., M.F.O., L.T.H., K.N.; Writing –  
420 Review & Editing, M.C.H., J.M.N., G.R.B., S.S., N.R.F., K.P.R., D.M.T. ; Funding Acquisition, J.M.N  
421 and W.D.S.; Resources, J.M.N, T.R.A., W.D.S., D.M.T., M.F.O., F.S.; Supervision, J.M.N., W.D.S.,  
422 D.M.T., T.R.A., F.S.

423

424 **Declaration of Interest**

425 The authors declare no competing interests.

426 **Figure Titles and Legends**

427 *Figure 1. Cortical CINs exhibit low levels of ERK/MAPK expression and activity.*

428 **(A-D)** Representative confocal images of *Slc32A1:Cre, Ai9* sensorimotor cortex. Note the robust expression  
429 of RFP in brain regions with high densities of GABAergic neurons. (Scale bar = 100  $\mu$ m) **(E-M)**  
430 Immunolabeling for MEK1 (E-G) and ERK2 (H-J) showed comparatively low expression in inhibitory  
431 CINs (yellow outlines) when compared to NEUN<sup>+</sup>/*Ai9*<sup>-</sup> excitatory neurons (arrowheads) in layer II (n=3).  
432 Relatively lower expression of P-ERK1/2 was also detected in inhibitory CINs when compared to excitatory  
433 neurons (n=3). (Scale bar = 10  $\mu$ m) See also Figure S1.

434

435 *Figure 2. MEK1 hyperactivation leads to a selective reduction in PV-expressing CINs in the postnatal*  
436 *cortex.*

437 **(A-H)** *caMek1, Slc32A1:Cre, Ai9* mutant P3.5 (A-D) and P60 (E-H) primary somatosensory cortices exhibit  
438 reduced numbers of *Ai9*-expressing CINs in comparison to *Slc32A1:Cre, Ai9* controls (quantification in **I**,  
439 n=3, mean  $\pm$  SEM, \* = p < 0.05). (Scale bar = 100  $\mu$ m) **(J-Q)** We quantified the proportion of fluorescently  
440 co-labeled PV/RFP or SST/RFP co-expressing CINs in the sensory cortex (J). Confocal micrographs of  
441 RFP-expressing CINs at P60 demonstrates that the proportion of PV<sup>+</sup>/RFP<sup>+</sup> CINs, but not SST<sup>+</sup>/RFP<sup>+</sup> CINs,  
442 was significantly decreased in mutants (N-P) in comparison to controls (K-M) (quantification in **Q**: n=3,  
443 mean  $\pm$  SEM, \* = p < 0.05). (Scale bar = 100  $\mu$ m) **(R-V)** Mutant PV-CINs (T-U, green arrowheads in T)  
444 display increased soma size in comparison to control PV-CINs (R-S) (quantification in **V**, n = 21 control  
445 neurons, 42 mutant neurons, mean  $\pm$  SEM, \* = p < 0.001). PV/RFP<sup>+</sup> CINs displayed no qualitative change  
446 in soma size (blue arrowheads). (Scale bar = 25  $\mu$ m) See also Figure S2.

447

448 *Figure 3. Loss of Erk1/2 does not alter CIN number.*

449 **(A-B)** Representative images of P6 coronal brain slices show no gross anatomical defects between *Erk1*<sup>-/-</sup>,  
450 *Erk2*<sup>fl/fl</sup>, *Slc32A1:Cre, Ai9* mutants and *Erk1*<sup>-/-</sup>, *Erk2*<sup>fl/wt</sup>, *Slc32A1:Cre, Ai9* controls. **(C-H)** Reduced ERK2  
451 protein was observed in layer V *Ai9*-expressing CINs in mutant primary somatosensory cortices in

452 comparison to controls. (Scale bar = 3  $\mu$ m) **(I-L)** No difference in the density of *Ai9*-expressing CINs was  
453 observed between mutants and controls (quantification in **M**; n=3, mean  $\pm$  SEM,  $p > 0.05$ ). (Scale bar =  
454 100  $\mu$ m) See also Figure S3.

455

456 *Figure 4. A subset of immature GABAergic neurons undergo cell death during mid-embryogenesis.*

457 **(A)** E13.5 coronal section of RFP-labeled CINs in the mantle zones of the *Slc32A1:Cre* subpallium during  
458 mid-embryogenesis. **(B-F)** Immunolabeling for cleaved caspase 3 (CC3) showed a significant increase in  
459 the number of apoptotic profiles in *caMek1, Slc32A1:Cre* mutants (D-E) as compared to controls (B-C)  
460 (quantification in **F**; n=3, mean  $\pm$  SEM, \* =  $p < 0.05$ ). (Scale bar = 100  $\mu$ m) **(G-Q)** Representative confocal  
461 z-stacks of CC3 labeled cells from *caMek1, Slc32A1:Cre* embryos (G-N, Scale bar = 2  $\mu$ m) and *caMek1,*  
462 *Nkx2.1:Cre* embryos (O-Q) show clear colocalization with RFP and a condensed, pyknotic nuclear  
463 morphology. See also Figure S4.

464

465 *Figure 5. caMek1 Slc32A1:Cre CINs maintain typical fast-spiking properties, but a subset of mice exhibit*  
466 *seizure-like phenotypes.*

467 **(A)** Representative traces from forebrain-penetrating EEG revealed epochs of synchronous firing in 3 of 6  
468 *caMek1 Slc32A1:Cre*, but not control mice. **(B)** Tail vein PTZ injections revealed a significant reduction in  
469 mean dose to seizure onset of PTZ (n = 6, mean  $\pm$  SEM, \* =  $p < 0.001$ ). **(C-F)** *caMek1 Slc32A1:Cre* cortices  
470 display aberrant clusters of GFAP-labeled astrocytes (**E**, arrowheads, insets in **F**) that were not observed in  
471 controls (C-D) (n=3). (Scale bar = 100  $\mu$ m) **(G)** Representative current clamp recordings of FS CINs in P21  
472 *Nkx2.1:Cre Ai9* and *caMek1 Nkx2.1:Cre Ai9* mutant cortices. **(H)** Mutant CINs had a significantly reduced  
473 FI slope in comparison to controls (mean  $\pm$  SEM,  $p < 0.05$ ). **(K)** Summary table of FS CIN intrinsic  
474 properties. See also Figure S5.

475

476 *Figure 6. Layer 2/3 excitatory neurons in caMEK1 Slc32A1:Cre mice display reduced perisomatic*  
477 *inhibitory innervation.*

478 **(A-F)** Representative high-resolution confocal Airyscan images of triple immunolabeled cortical sections  
479 for Ai3/EYFP, VGAT, and NEUN. Excitatory neuron perisomatic domains were outlined and  
480 quantification of VGAT-labeled pixels revealed that mutants have a significant reduction in the amount of  
481 perisomatic VGAT-labeling **(A-F)** (Scale bar = 3  $\mu\text{m}$ ), but not neuropil VGAT-labeling **(G-J)** (Scale bar  
482 = 10  $\mu\text{m}$ ), in comparison to controls (quantification in **K**; perisomatic - n = 48 control, 53 mutant neurons;  
483 neuropil - n = 33 control, 30 mutant regions, mean  $\pm$  SEM, \* =  $p < 0.05$ ).

484

485 *Figure 7. MEK1 hyperactivation drives enhanced PNN accumulation on PV-CINs.*

486 **(A-H)** P60 representative coronal sections of *Slc32A1:Cre Ai3* (A-C) and *caMek1 Slc32A1:Cre Ai3* (D-F)  
487 cortices immunolabeled for GFP, WFA, and PV. The WFA channel was imaged using the same  
488 acquisition settings. A significant increase in WFA-labeled area per neuron was detected in mutant  
489 cortices as compared to controls (quantification in **G**; n = 63 control, 54 mutant neurons, mean  $\pm$  SEM, \*  
490 =  $p < 0.001$ ). Analysis of WFA-labeling intensity also yielded a significant increase in integrated density  
491 in mutant CINs (quantification in **H**; n = 63 control, 54 mutant neurons, mean  $\pm$  SEM, \* =  $p < 0.001$ ).  
492 (Scale bar = 100  $\mu\text{m}$ ) **(I-L)** Expression of the DNA oxidation marker 8-oxo-dg expression in WFA<sup>+</sup>  
493 *caMek1 Slc32A1:Cre* CINs (K-L) was qualitatively unchanged when compared to control WFA<sup>+</sup> CINs (I-  
494 J). (Scale bar = 25  $\mu\text{m}$ )

495

496 *Figure 8. caMEK1 Slc32A1:Cre mice exhibit reduced behavioral response inhibition capacity.*

497 **(A-F)**. P-ERK1/2 labeling in PFC PNs is significantly reduced in mutants as compared to controls. Note  
498 the decrease in RFP<sup>+</sup> CINs in the mutant PFC (E) relative to control (B) (n=3). (Scale bar = 100  $\mu\text{m}$ )  
499 **(G)** Schematic of the Fixed-minimum Interval (FMI) task. **(H)** Mutant mice had a significant reduction in  
500 mean median IRT during FMI acquisition in 2s and 4s schedules (n=12, mean  $\pm$  SEM, \* =  $p < 0.05$ ). **(I)**  
501 Mutant mean CQV of IRTs during both acquisition and asymptotic phases was significantly increased in  
502 2s, 4s, and 8s FMI schedules (mean  $\pm$  SEM, \* =  $p < 0.05$ ). **(J)** Median acquisition and asymptotic LTI  
503 was significantly increased in the FMI 8s, but not in the 2s and 4s schedules (mean  $\pm$  SEM, \* =  $p < 0.05$ ).

504 **(K)** Mutant mice had a reduction in mean acquisition ORs at 4s and a significant reduction in both mean  
505 acquisition and asymptotic ORs during the 8s FMI (mean  $\pm$  SEM, \* =  $p < 0.05$ ).

506 **STAR Methods**

507 *Mice*

508 All transgenic mice were handled and housed in accordance with the guidelines of the Institutional  
509 Animal Care and Use Committee at Arizona State University, the University of Arizona, and Barrow  
510 Neurological Institute. Mice were kept on a daily 12-hour light-dark cycle and were fed *ad libitum*.  
511 *Slc32a1:Cre<sup>+/+</sup>*, *Dlx5/6:Cre<sup>+/-</sup>*, or *Nkx2.1:Cre<sup>+/-</sup>* mice were crossed with *CAG-lox-STOP-lox-Mek1<sup>S217/221E+/-</sup>*  
512 (caMEK1) mice to generate mutants expressing *caMek1* in Cre-expressing cell types. *CaMek1* mice were  
513 kindly provided by Dr. Maike Krenz and Dr. Jeffrey Robbins. Loss-of-ERK1/2 mouse mutants were  
514 generated with *Erk1/Mapk3<sup>-/-</sup>* mice possessing a neo-insertion in exons 1-7 and *Erk2/Mapk1<sup>fl/fl</sup>* mice with a  
515 loxp flanked exon 2. Littermates expressing Cre-Recombinase were utilized as controls for most  
516 experiments, unless otherwise indicated. Cre-dependent tdTomato (*Ai9*) or eYFP (*Ai3*) strains were used to  
517 endogenously label Cre-expressing cells for visualization purposes. Genomic DNA was extracted from tail  
518 or toe samples for standard genotyping by PCR using the following primer combinations: (listed 5'-3'): Cre  
519 – TTCGCAAGAACCTGATGGAC and CATTGCTGTCACCTGGTCGT to amplify a 266 bp  
520 fragment; *Erk1/Mapk3* – AAGGTAAACATCCGGTCCAGCA, AAGCAAGGCTAAGCCGTACC, and  
521 CATGCTCCAGACTGCCTTGG to amplify a 571 bp segment wild type and a 250 bp segment KO  
522 allele; *Erk2/Mapk1* – AGCCAACAATCCCAAACCTG, and GGCTGCAACCATCTCACAAT amplify  
523 275 bp wild-type and 350 bp floxed alleles; *caMek1<sup>S217/221E</sup>* –GTACCAGCTCGGCGGAGACCAA and  
524 TTGATCACAGCAATGCTAACTTTC amplify a 600 bp fragment; *Ai3/Ai9* – four primers were used -  
525 AAGGGAGCTGCAGTGGAGTA, CCGAAAATCTGTGGGAAGTC, ACATGGTCCTGCTGGAGTTC,  
526 and GGCATTAAGCAGCGTATCC amplify a 297 bp wt Rosa26 segment and a 212 bp *Ai3/Ai9* allele.

527

528 *Tissue Preparation and Immunostaining*

529 Mice of the appropriate postnatal age were anesthetized and transcardially perfused with PBS  
530 followed by cold 4% PFA in PBS. Brains were dissected, post-fixed at 4°C, and sectioned with a vibratome  
531 or cryopreserved with 30% sucrose and sectioned with a cryostat. Free-floating sections were incubated in

532 primary antibody solution consisting of 1X PBS with 0.05 - 0.2% Triton and 5% Normal Donkey Serum  
533 (NDS). Sections were then incubated in species-specific, fluorescently-conjugated secondary antibodies in  
534 blocking solution overnight. For embryonic sections, timed-bred embryos were collected at the appropriate  
535 embryonic age, immersion fixed in cold 4% PFA in 1X PBS and cryopreserved in serial sucrose  
536 concentrations (15%, 25% in 1X PBS) until fully infiltrated. Embryonic brain sections were cryosectioned  
537 and directly mounted onto Fisher Superfrost Plus slides. Sections were gently rinsed in 1X PBS 0.05%  
538 Triton, incubated in blocking solution (1X PBST 0.05% Triton and 5% NDS) and incubated overnight in  
539 primary antibody prepared in blocking solution. The primary antibodies used in these experiments were:  
540 goat anti-parvalbumin (Swant, 1:1000), rabbit anti-somatostatin (Peninsula, 1:1000), biotin-conjugated  
541 WFA (Vector, 60ug/mL), chicken anti-GFP (Aves, 1:1000), chicken anti-RFP (Rockland, 1:1000), rabbit  
542 anti-P-ERK (Cell Signaling, 1:1000), rabbit anti-MEK1 (Abcam, 1:1000), rabbit anti-ERK2 (Abcam,  
543 1:1000), rabbit anti P-ERK1/2 (Cell Signaling, 1:1000), mouse anti-NEUN (Millipore 1:1000), rabbit anti-  
544 cleaved caspase 3 (Cell Signaling, 1:1000), rabbit anti-GFAP (Abcam 1:1000), rabbit anti-VGAT (Synaptic  
545 Systems, 1:1000), and mouse anti-8-oxo-DG (R&D Systems, 1:1000). Tissue was then washed in 1X PBS  
546 0.05% Triton and incubated in fluorescently conjugated secondary antibody solution before rinsing and  
547 cover-slipping for microscopic analysis. Alexa-Fluor 488, 568, and 647 conjugated anti-rabbit, anti-goat,  
548 and anti-chicken antibodies were diluted to 1:1000 in 1X PBS 0.05 – 0.2% Triton and 5% NDS.  
549 Streptavidin-conjugated fluorophores were used to visualize WFA labeling. Representative images were  
550 collected on a Zeiss (LSM710 & LSM800) laser scanning confocal microscope and optimized for  
551 brightness and contrast in Adobe Photoshop.

552

### 553 *Image Analysis*

554 Images of at least three anatomically matched sections that include a brain region of interest were  
555 quantified for labeled cell density by observers blind to genotype. For estimating labeled cell density in the  
556 cortex, a column spanning all cortical layers was defined, the cross-sectional area measured, and the number  
557 of labeled cells was assessed. The proportion of cells co-labeled with Cre-dependent fluorescent reporters



558 was also determined for select experiments. Quantification of cellular labeling was averaged across all  
559 images collected from an individual mouse. At least three mice were collected for each genotype and results  
560 were analyzed using Student's t-tests unless indicated otherwise.

561 We quantified the extent of inhibitory synapse labeling in the perisomal domain of excitatory  
562 neurons from confocal images of VGAT/NeuN/GFP co-labeled sections. Confocal images were collected  
563 using optimal Airyscan settings for a 63x 1.4 NA objective on a Zeiss LSM800 with the same acquisition  
564 parameters, laser power, gain, and offset for VGAT detection. NeuN<sup>+</sup>/GFP<sup>-</sup> neurons in S1 layer 2/3 with a  
565 pyramidal morphology and residing 5-10 $\mu$ m from the tissue section surface were randomly selected by a  
566 blinded observer. NeuN<sup>+</sup> soma were outlined in Photoshop and a ring 1.8 $\mu$ m in thickness was then  
567 established to specify the perisomatic space. VGAT-immunolabeling from perisomatic regions of interest  
568 were imported into ImageJ where a moment-preserving autothreshold algorithm, "Moments", was utilized  
569 to define the total area of perisomatic VGAT-labeling in an unbiased manner. Perisomal VGAT-labeled  
570 area was then normalized to the total perisomatic area for that neuron. A total of 48 control and 53 mutant  
571 neurons from three different mice were analyzed. A similar approach was utilized to quantify VGAT  
572 labeling in areas enriched in dendrites by analyzing randomly selected regions of the layer 2/3 neuropil that  
573 did not incorporate any NeuN-labeled soma.

574

#### 575 *EEG Recordings and Seizure Threshold Assessment*

576 Adult *caMek1*, *Slc32A1:Cre* mutant and *Slc32A1:Cre* control mice were assessed for epileptiform  
577 activity with bilateral 175 $\mu$ m tungsten wires implanted in the forebrain. After recovery from electrode  
578 implantation, mice were connected to suspended EEG leads, housed individually, and monitored daily in  
579 home cages for seizure-like activity using a 128 channel Natus Medical EEG machine. EEG recordings  
580 were examined for synchronous firing between hemispheres and representative epileptiform traces were  
581 acquired. Following intracranial recording, mice were injected with the seizure inducing compound,  
582 Pentylentetrazol (PTZ; Sigma P6500). Mice were gently restrained and the tail vein was intravenously  
583 injected with 0.34ml/min of 5mg/mL PTZ in 0.9% saline 10USP heparin by automated pump. Initial onset

584 of seizure was defined as the first sign of involuntary movement by an observer blinded to genotype. Time  
585 to seizure was recorded and PTZ  $\mu\text{g}/\text{g}$  of body weight was calculated.

586

### 587 *Slice electrophysiology*

588 *caMek1<sup>+/-</sup>*, *Nkx2.1:Cre<sup>+/-</sup>*, *Ai9<sup>+/-</sup>* mutant and *Nkx2.1:Cre<sup>+/-</sup>*, *Ai9<sup>+/-</sup>* control mice were sacrificed  
589 between postnatal day 21 to 24 and used for the in vitro slice electrophysiology. Brain slicing was performed  
590 as reported previously (Nichols et al., 2018). In brief, mice were deeply anesthetized by isoflurane  
591 inhalation before decapitation. Brains were quickly removed and the coronal slices (350  $\mu\text{M}$ ) of the  
592 somatosensory cortex were produced on a vibratome (VT 1200; Leica, Nussloch, Germany) in fully  
593 oxygenated (95%  $\text{O}_2$ , 5%  $\text{CO}_2$ ), ice-cold artificial cerebral spinal fluid (aCSF) containing (in mM): 126  
594 NaCl, 26  $\text{NaHCO}_3$ , 2.5 KCl, 10 glucose, 1.25  $\text{Na}_2\text{H}_2\text{PO}_4 \cdot \text{H}_2\text{O}$ , 1  $\text{MgSO}_4 \cdot 7\text{H}_2\text{O}$ , 2  $\text{CaCl}_2 \cdot \text{H}_2\text{O}$ , pH 7.4. The  
595 slices were incubated in the same aCSF at 32°C for 30min before being allowed to recover at room  
596 temperature for an additional 30 min before patch clamp recordings were started.

597 After recovery, slices were transferred into recording chamber and perfused continuously with  
598 aCSF of 32°C at a rate of 1-2 ml/min. Then whole-cell patch clamp recordings were performed on  
599 tdTomato-positive fast-spiking (FS) interneurons in the somatosensory cortex layer V/VI (L5/6) by using  
600 an Axon 700B amplifier. The FS neurons were identified by lack of an emerging apical dendrite and their  
601 intrinsic firing response to current injection (Agmon & Connors, 2018; Anderson et al., 2010; McCormick  
602 et al., 1985). Clampex 10.6 (Molecular Devices) was used to collect data and pipettes (2-5  $\text{M}\Omega$ ) were pulled  
603 from borosilicate glass (BF150-110-10, Sutter Instruments) by using sutter puller (Model P-1000, Sutter  
604 Instruments), filled with an internal solution that contains (in mM): 135 K-Gluconate, 4 KCl, 2 NaCl, 10  
605 HEPES, 4 EGTA, 4 Mg ATP and 0.3 Na Tris. The stability of the recordings was monitored during the  
606 experiments, and only the recordings with the series resistances ( $R_s$ ) less than both 25  $\text{M}\Omega$  and 20% of the  
607 membrane resistances were chosen for analysis. For the input resistance calculation, the steady plateau of  
608 the voltage responding to the current input of -50 pA step with 1 s duration was used and intrinsic  
609 parameters were measured as previously reported (Nichols et al., 2018). Adaptation index was calculated

610 as the ratio of the 1<sup>st</sup> interspike interval over the last (i.e.  $F_{1st\ ISI}/F_{last\ ISI}$ ). The frequency (F) – current (I)  
611 slope was calculated as the number of induced action potentials (APs) divided by the current step (number  
612 of APs at 150pA-number of APs at 100pA)/(150pA-100pA). Unpaired Student's t-test and two-way  
613 ANOVA with Bonferroni post hoc tests were used for statistical analysis.

614

#### 615 *Behavioral Testing*

##### 616 *Open Field Testing*

617 The open field test was used to test voluntary locomotor capabilities and anxiety-like behavior. The  
618 apparatus consisted of a 40x40cm arena enclosed by 30cm high opaque walls. A single 60W bulb was  
619 positioned to brightly illuminate the center of the chamber with dim lighting near the walls. Mice were  
620 placed into the apparatus and recorded for a total of 10 minutes. Video data were analyzed for total distance  
621 traveled and time spent in the center quadrant.

622

##### 623 *Elevated Plus Maze*

624 The elevated plus maze was constructed from black polycarbonate, elevated 81cm off the ground,  
625 and oriented in a plus formation with two 12x55cm open arms and two 12x55cm closed arms extending  
626 from an open 12x12cm center square. Closed arm walls were 40cm high extending from the base of the  
627 arm at the center square. The apparatus was lit with a 60W bulb with light concentrated on the center square.  
628 At the beginning of the trial, mice were placed in the center square, facing the south open arm, and recorded  
629 while freely exploring for 5 minutes.

630

##### 631 *Social Approach Assay*

632 The social approach apparatus was made of transparent plexiglass and contained three 20x30x30cm  
633 chambers (total dimensions 60x30x30cm) connected by open doorways. Prior to experimental social trials,  
634 mice were habituated to the apparatus and allowed to freely explore all three chambers for 5 minutes. At  
635 the end of the 5 minutes, mice were removed and placed in their home cage. A sex- and age-matched

636 stimulus mouse was then placed into a small empty cage in chamber 1 of the apparatus. The experimental  
637 mouse was reintroduced to the center chamber (chamber 2) of the apparatus and recorded while freely  
638 exploring for 10 minutes. The time spent in the chamber with the stimulus mouse (chamber 1) or the empty  
639 chamber (chamber 3) was then measured.

640

#### 641 *Fixed Minimum Interval (FMI)*

642 Twenty-four adult mice (12 *Slc32A1:Cre* mice: 5 males, 7 females; 12 *caMek1, Slc32A1:Cre* mice:  
643 6 males, 6 females) were kept on a 12-hour reverse light-dark cycle. Animals had free access to water in  
644 their home cages, but access to food was gradually reduced in the week prior to behavioral training, where  
645 1 hr of food access was provided 30 min after the end of each daily training session. Body weights were  
646 maintained such that mice lost no more than 15% of starting body weight. Behavioral testing was conducted  
647 in eight MED Associates (St. Albans, VT, USA) modular test chambers (240 mm length × 200 mm width  
648 × 165 mm height; ENV-307W). Each chamber was enclosed in a sound- and light-attenuating cabinet  
649 (ENV-022V) equipped with a fan for ventilation that provided masking noise of approximately 60dB  
650 (ENV-025-F28). The back wall and hinged front door of each chamber were made of Plexiglas. The side  
651 walls of the chamber were made of aluminum, and the right wall contained the manipulanda and reward  
652 receptacle. The floor was composed of thin metal bars. A circular reward receptacle was positioned in the  
653 center of the front panel and equipped with a head entry detector (ENV-302HD), a liquid dipper (ENV-  
654 302W-S), and a yellow LED (ENV-321W). The reward receptacle was flanked by a nose-poke device  
655 including an LED-illuminator (ENV-314M). The chamber was fitted with a house light (ENV-315W) at  
656 ceiling level above the back wall (ENV-323AW) and a 4.5kHz tone generator (ENV-323HAM).  
657 Experimental programs were arranged via a MED PC interface connected to a PC controlled by MED-PC  
658 IV software. All behavioral sessions were 30 min long, including a 3-min warm-up period during which no  
659 stimuli were activated.

660           *Reinforcement Training and Autoshaping.* Mice were first trained to obtain 0.1 cc of diluted  
661 sweetened condensed milk from the liquid dipper (the reinforcer) in the reward receptacle. Following the  
662 3-min warmup period, a reinforcer was made available, followed by consistent reinforcer delivery at  
663 variable, pseudo-randomly selected inter-trial intervals (ITIs) for the remainder of the session (mean = 45  
664 s). No stimuli were activated during ITIs. When the dipper was activated and a reinforcer was available, a  
665 2.9-kHz tone, the head-entry LED, and the house light were turned on. The reinforcer remained available  
666 until it was obtained by the mouse, which deactivated the 2.9-kHz tone, the LED, and house light. The  
667 dipper remains activated for 2.5s after the mouse obtains the reinforcer. Following 5 sessions of  
668 reinforcement training, the procedure was modified for 5 autoshaping sessions which, in the last 8s of  
669 each ITI, the LED inside of the nose-poke device was turned on. The nose-poke LED was then turned off  
670 and reinforcement was delivered as described. If the mouse nose-poked the device during the time when  
671 the LED was on, it was turned off and reinforcement was delivered immediately. The autoshaping  
672 procedure was then modified for another 5 sessions such that reinforcement delivery was contingent upon  
673 a single nose-poke to the nose-poke device when its LED was illuminated and the ITI was reduced to 10s.

674           *Fixed-Minimum Interval Training.* Mice were then trained on the fixed-minimum interval (FMI)  
675 schedule. After the 3-min warmup period, the houselight was deactivated. A nose-poke (*initiating*  
676 *response*) activated the nose-poke LED and marked the beginning of the inter-response time (IRT). A  
677 subsequent head entry into the reward receptacle (*terminating response*) terminated the IRT.  
678 Reinforcement was delivered only if the IRT was longer than the criterion time, which was dependent  
679 upon the FMI schedule. IRTs shorter than the criterion time terminated without reinforcement,  
680 deactivated the nose-poke LED, and another trial could be immediately initiated. IRTs greater than or  
681 equal to the criterion time resulted in delivery of reward, deactivation of the nose-poke LED, a 2.5s  
682 duration 2.9kHz tone, and subsequent removal of the liquid dipper. Houselights were then activated for a  
683 10s ITI, after which houselight deactivation indicated a new trial could be initiated via nose-poke. The  
684 time between the end of the ITI and the nose-poke initiating response was measured and termed the  
685 *latency to initiate (LTI)*. All mice were initially trained on an FMI schedule with a criterion time of 0.5s

686 (FMI 0.5s) until stability was achieved. The FMI 0.5s condition was implemented to acclimate mice to  
687 the task and is not used to evaluate response inhibition capacity. Performance was considered stable when  
688 a non-significant linear regression for mean median IRTs across 5 consecutive sessions was achieved,  
689 using a significance criterion of .05. Following stability on the FMI 0.5s schedule, subjects experience  
690 FMI 2s, 4s, and 8s. Each subject was trained to stability.

691 *Data Analysis.* Four parameters were tracked on a session-by-session basis: median latency-to-  
692 initiate trials (LTI), median inter-response time (IRT), the coefficient of quartile variation (CQV) of IRTs  
693 (difference between 1<sup>st</sup> and 3<sup>rd</sup> quartile divided by their sum), and the number of obtained reinforcers  
694 (ORs). The acquisition phase of each parameter was defined as the mean performance during the first five  
695 sessions of each schedule, while the asymptote was defined as the mean during the last five sessions.  
696 ANOVAs were conducted to assess statistical significance of time and genotype on FMI schedule and  
697 Student's *t*-tests were conducted to examine parameter differences based on genotype.

698 **References**

- 699 Adviento, B., Corbin, I.L., Widjaja, F., Desachy, G., Enrique, N., Rosser, T., Risi, S., Marco, E.J., Hendren,  
700 R.L., Bearden, C.E., et al. (2014). Autism traits in the RASopathies. *J Med Genet* 51, 10-20.
- 701 Alessi, D.R., Saito, Y., Campbell, D.G., Cohen, P., Sithanandam, G., Rapp, U., Ashworth, A., Marshall,  
702 C.J., and Cowley, S. (1994). Identification of the sites in MAP kinase kinase-1 phosphorylated by  
703 p74raf-1. *EMBO J* 13, 1610-1619.
- 704 Anastasaki, C., and Gutmann, D. (2014). Neuronal NF1/RAS regulation of cyclic AMP requires atypical  
705 PKC activation. *Human Molecular Genetics* 23, 6712-6721.
- 706 Anderson, T.R., Huguenard, J.R., Prince, D.A. (2010) Differential effects of Na<sup>+</sup>-K<sup>+</sup> ATPase blockade on  
707 cortical layer V neurons. *J Physiol.* 588,4401-14.
- 708 Aoidi, R., Houde, N., Landry-Truchon, K., Holter, M., Jacquet, K., Charron, L., Krishnaswami, S., Yu, B.,  
709 Rauen, K., Bisson, N., et al. (2018). Mek1(Y130C) mice recapitulate aspects of human cardio-facio-  
710 cutaneous syndrome. *Disease Models & Mechanisms* 11.
- 711 Bae, M.H., Bissonette, G.B., Mars, W.M., Michalopoulos, G.K., Achim, C.L., Depireux, D.A., and Powell,  
712 E.M. (2010). Hepatocyte growth factor (HGF) modulates GABAergic inhibition and seizure  
713 susceptibility. *Exp Neurol* 221, 129-135.
- 714 Berryer, M.H., Chattopadhyaya, B., Xing, P., Riebe, I., Bosoi, C., Sanon, N., Antoine-Bertrand, J.,  
715 Lévesque, M., Avoli, M., Hamdan, F.F., et al. (2016). Decrease of SYNGAP1 in GABAergic cells  
716 impairs inhibitory synapse connectivity, synaptic inhibition and cognitive function. *Nat Commun* 7,  
717 13340.
- 718 Bitanhirwe, B.K., and Woo, T.U. (2014). Perineuronal nets and schizophrenia: the importance of neuronal  
719 coatings. *Neurosci Biobehav Rev* 45, 85-99.
- 720 Bizarro, L., Murtagh, C., and Stoleran, I. (2003). Differing effects of nicotine, amphetamine and caffeine  
721 on performance of a 5-choice serial reaction time task. *Journal of Psychopharmacology* 17, A31-A31.

722 Brown, J., Diggs-Andrews, K., Gianino, S., and Gutmann, D. (2012). Neurofibromatosis-1 heterozygosity  
723 impairs CNS neuronal morphology in a cAMP/PKA/ROCK-dependent manner. *Molecular and Cellular*  
724 *Neuroscience* 49, 13-22.

725 Bueno, O.F., De Windt, L.J., Tymitz, K.M., Witt, S.A., Kimball, T.R., Klevitsky, R., Hewett, T.E., Jones,  
726 S.P., Lefer, D.J., Peng, C.F., et al. (2000). The MEK1-ERK1/2 signaling pathway promotes  
727 compensated cardiac hypertrophy in transgenic mice. *EMBO J* 19, 6341-6350.

728 Cabungcal, J.H., Steullet, P., Morishita, H., Kraftsik, R., Cuenod, M., Hensch, T.K., and Do, K.Q. (2013).  
729 Perineuronal nets protect fast-spiking interneurons against oxidative stress. *Proc Natl Acad Sci U S A*  
730 110, 9130-9135.

731 Cagnol, S., and Chambard, J.C. (2010). ERK and cell death: mechanisms of ERK-induced cell death--  
732 apoptosis, autophagy and senescence. *FEBS J* 277, 2-21.

733 Cancedda, L., Fiumelli, H., Chen, K., and Poo, M. (2007). Excitatory GABA action is essential for  
734 morphological maturation of cortical neurons in vivo. *Journal of Neuroscience* 27, 5224-5235.

735 Cancedda, L., Putignano, E., Impey, S., Maffei, L., Ratto, G.M., and Pizzorusso, T. (2003). Patterned vision  
736 causes CRE-mediated gene expression in the visual cortex through PKA and ERK. *J Neurosci* 23, 7012-  
737 7020.

738 Chao, H.T., Chen, H., Samaco, R.C., Xue, M., Chahrour, M., Yoo, J., Neul, J.L., Gong, S., Lu, H.C., Heintz,  
739 N., et al. (2010). Dysfunction in GABA signalling mediates autism-like stereotypies and Rett syndrome  
740 phenotypes. *Nature* 468, 263-269.

741 Chattopadhyaya, B., Di Cristo, G., Higashiyama, H., Knott, G.W., Kuhlman, S.J., Welker, E., and Huang,  
742 Z.J. (2004). Experience and activity-dependent maturation of perisomatic GABAergic innervation in  
743 primary visual cortex during a postnatal critical period. *J Neurosci* 24, 9598-9611.

744 Chattopadhyaya, B., Di Cristo, G., Wu, C.Z., Knott, G., Kuhlman, S., Fu, Y., Palmiter, R.D., and Huang,  
745 Z.J. (2007). GAD67-mediated GABA synthesis and signaling regulate inhibitory synaptic innervation  
746 in the visual cortex. *Neuron* 54, 889-903.



747 Clement, J.P., Aceti, M., Creson, T.K., Ozkan, E.D., Shi, Y., Reish, N.J., Almonte, A.G., Miller, B.H.,  
748 Wiltgen, B.J., Miller, C.A., et al. (2012). Pathogenic SYNGAP1 mutations impair cognitive  
749 development by disrupting maturation of dendritic spine synapses. *Cell* 151, 709-723.

750 Cowley, S., Paterson, H., Kemp, P., and Marshall, C.J. (1994). Activation of MAP kinase kinase is  
751 necessary and sufficient for PC12 differentiation and for transformation of NIH 3T3 cells. *Cell* 77, 841-  
752 852.

753 Cui, Y., Costa, R., Murphy, G., Elgersma, Y., Zhu, Y., Gutmann, D., Parada, L., Mody, I., and Silva, A.  
754 (2008). Neurofibromin Regulation of ERK Signaling Modulates GABA Release and Learning. *Cell*  
755 135, 549-560.

756 Denaxa, M., Neves, G., Rabinowitz, A., Kemlo, S., Liodis, P., Burrone, J., and Pachnis, V. (2018).  
757 Modulation of Apoptosis Controls Inhibitory Interneuron Number in the Cortex. *Cell Rep* 22, 1710-  
758 1721.

759 Digilio, M.C., Lepri, F., Baban, A., Dentici, M.L., Versacci, P., Capolino, R., Ferese, R., De Luca, A.,  
760 Tartaglia, M., Marino, B., et al. (2011). RASopathies: Clinical Diagnosis in the First Year of Life. *Mol*  
761 *Syndromol* 1, 282-289.

762 Doughty, A.H., and Richards, J.B. (2002). Effects of reinforcer magnitude on responding under differential-  
763 reinforcement-of-low-rate schedules of rats and pigeons. *J Exp Anal Behav* 78, 17-30.

764 Ehrman, L., Nardini, D., Ehrman, S., Rizvi, T., Gulick, J., Krenz, M., Dasgupta, B., Robbins, J., Ratner, N.,  
765 Nakafuku, M., et al. (2014). The Protein Tyrosine Phosphatase Shp2 Is Required for the Generation of  
766 Oligodendrocyte Progenitor Cells and Myelination in the Mouse Telencephalon. *Journal of*  
767 *Neuroscience* 34, 3767-3778.

768 El Idrissi, A., Ding, X.H., Scalia, J., Trenkner, E., Brown, W.T., and Dobkin, C. (2005). Decreased  
769 GABA(A) receptor expression in the seizure-prone fragile X mouse. *Neurosci Lett* 377, 141-146.

770 Fazzari, P., Paternain, A.V., Valiente, M., Pla, R., Luján, R., Lloyd, K., Lerma, J., Marín, O., and Rico, B.  
771 (2010). Control of cortical GABA circuitry development by Nrg1 and ErbB4 signalling. *Nature* 464,  
772 1376-1380.

- 773 Fino, E., Packer, A.M., and Yuste, R. (2013). The logic of inhibitory connectivity in the neocortex.  
774 *Neuroscientist* 19, 228-237.
- 775 Flames, N., Long, J., Garratt, A., Fischer, T., Gassmann, M., Birchmeier, C., Lai, C., Rubenstein, J., and  
776 Marin, O. (2004). Short- and long-range attraction of cortical GABAergic interneurons by Neuregulin-  
777 1. *Neuron* 44, 251-261.
- 778 Fowke, T.M., Galinsky, R., Davidson, J.O., Wassink, G., Karunasinghe, R.N., Prasad, J.D., Bennet, L.,  
779 Gunn, A.J., and Dean, J.M. (2018). Loss of interneurons and disruption of perineuronal nets in the  
780 cerebral cortex following hypoxia-ischaemia in near-term fetal sheep. *Sci Rep* 8, 17686.
- 781 Gabay, Y., Shahbani-Khateb, E., and Mendelsohn, A. (2018). Feedback Timing Modulates Probabilistic  
782 Learning in Adults with ADHD. *Sci Rep* 8, 15524.
- 783 Galtrey, C.M., and Fawcett, J.W. (2007). The role of chondroitin sulfate proteoglycans in regeneration and  
784 plasticity in the central nervous system. *Brain Res Rev* 54, 1-18.
- 785 Garg, S., Lehtonen, A., Huson, S.M., Emsley, R., Trump, D., Evans, D.G., and Green, J. (2013). Autism  
786 and other psychiatric comorbidity in neurofibromatosis type 1: evidence from a population-based study.  
787 *Dev Med Child Neurol* 55, 139-145.
- 788 Gauthier, A., Furstoss, O., Araki, T., Chan, R., Neel, B., Kaplan, D., and Miller, F. (2007). Control of CNS  
789 cell-fate decisions by SHP-2 and its dysregulation in Noonan syndrome. *Neuron* 54, 245-262.
- 790 Gelman, D., Martini, F., Nobrega-Pereira, S., Pierani, A., Kessaris, N., and Marin, O. (2009). The  
791 Embryonic Preoptic Area Is a Novel Source of Cortical GABAergic Interneurons. *Journal of*  
792 *Neuroscience* 29, 9380-9389.
- 793 Gelman, D.M., and Marin, O. (2010). Generation of interneuron diversity in the mouse cerebral cortex. *Eur*  
794 *J Neurosci* 31, 2136-2141.
- 795 Goldberg, E., Jeong, H., Kruglikov, I., Tremblay, R., Lazarenko, R., and Rudy, B. (2011). Rapid  
796 Developmental Maturation of Neocortical FS Cell Intrinsic Excitability. *Cerebral Cortex* 21, 666-682.

797 Green, T., Naylor, P.E., and Davies, W. (2017). Attention deficit hyperactivity disorder (ADHD) in  
798 phenotypically similar neurogenetic conditions: Turner syndrome and the RASopathies. *J Neurodev*  
799 *Disord* 9, 25.

800 Hensch, T. (2005a). Critical period mechanisms in developing visual cortex. *Current Topics in*  
801 *Developmental Biology*, Vol 69 69, 215-+.

802 Hensch, T.K. (2005b). Critical period plasticity in local cortical circuits. *Nat Rev Neurosci* 6, 877-888.

803 Hill, J.C., Herbst, K., and Sanabria, F. (2012). Characterizing operant hyperactivity in the Spontaneously  
804 Hypertensive Rat. *Behav Brain Funct* 8, 5.

805 Holter, M.C., Hewitt, L.T., Koebele, S.V., Judd, J.M., Xing, L., Bimonte-Nelson, H.A., Conrad, C.D.,  
806 Araki, T., Neel, B.G., Snider, W.D., et al. (2019). The Noonan Syndrome-linked Raf1L613V mutation  
807 drives increased glial number in the mouse cortex and enhanced learning. *PLoS Genet* 15, e1008108.

808 Hrvatin, S., Hochbaum, D.R., Nagy, M.A., Cicconet, M., Robertson, K., Cheadle, L., Zilionis, R., Ratner,  
809 A., Borges-Monroy, R., Klein, A.M., et al. (2018). Single-cell analysis of experience-dependent  
810 transcriptomic states in the mouse visual cortex. *Nat Neurosci* 21, 120-129.

811 Ishii, A., Furusho, M., and Bansal, R. (2013). Sustained Activation of ERK1/2 MAPK in Oligodendrocytes  
812 and Schwann Cells Enhances Myelin Growth and Stimulates Oligodendrocyte Progenitor Expansion.  
813 *Journal of Neuroscience* 33, 175-186.

814 Johnson, E.M., Ishak, A.D., Naylor, P.E., Stevenson, D.A., Reiss, A.L., and Green, T. (2019). PTPN11  
815 Gain-of-Function Mutations Affect the Developing Human Brain, Memory, and Attention. *Cereb*  
816 *Cortex* 29, 2915-2923.

817 Kelsom, C., and Lu, W. (2013). Development and specification of GABAergic cortical interneurons. *Cell*  
818 *Biosci* 3, 19.

819 Kessar, N., Magno, L., Rubin, A.N., and Oliveira, M.G. (2014). Genetic programs controlling cortical  
820 interneuron fate. *Curr Opin Neurobiol* 26, 79-87.

821 Klesse, L.J., Meyers, K.A., Marshall, C.J., and Parada, L.F. (1999). Nerve growth factor induces survival  
822 and differentiation through two distinct signaling cascades in PC12 cells. *Oncogene* 18, 2055-2068.

- 823 Krencik, R., Hokanson, K.C., Narayan, A.R., Dvornik, J., Rooney, G.E., Rauen, K.A., Weiss, L.A.,  
824 Rowitch, D.H., and Ullian, E.M. (2015). Dysregulation of astrocyte extracellular signaling in Costello  
825 syndrome. *Sci Transl Med* 7, 286ra266.
- 826 Krens, S.F., Spaink, H.P., and Snaar-Jagalska, B.E. (2006). Functions of the MAPK family in vertebrate-  
827 development. *FEBS Lett* 580, 4984-4990.
- 828 Krenz, M., Gulick, J., Osinska, H.E., Colbert, M.C., Molkentin, J.D., and Robbins, J. (2008). Role of  
829 ERK1/2 signaling in congenital valve malformations in Noonan syndrome. *Proc Natl Acad Sci U S A*  
830 105, 18930-18935.
- 831 Krishnan, K., Wang, B.S., Lu, J., Wang, L., Maffei, A., Cang, J., and Huang, Z.J. (2015). MeCP2 regulates  
832 the timing of critical period plasticity that shapes functional connectivity in primary visual cortex. *Proc*  
833 *Natl Acad Sci U S A* 112, E4782-4791.
- 834 Krueger, D.D., Osterweil, E.K., Chen, S.P., Tye, L.D., and Bear, M.F. (2011). Cognitive dysfunction and  
835 prefrontal synaptic abnormalities in a mouse model of fragile X syndrome. *Proc Natl Acad Sci U S A*  
836 108, 2587-2592.
- 837 Kumar, R.A., KaraMohamed, S., Sudi, J., Conrad, D.F., Brune, C., Badner, J.A., Gilliam, T.C., Nowak,  
838 N.J., Cook, E.H., Dobyns, W.B., et al. (2008). Recurrent 16p11.2 microdeletions in autism. *Hum Mol*  
839 *Genet* 17, 628-638.
- 840 Lajiness, J.D., Snider, P., Wang, J., Feng, G.S., Krenz, M., and Conway, S.J. (2014). SHP-2 deletion in  
841 postmigratory neural crest cells results in impaired cardiac sympathetic innervation. *Proc Natl Acad*  
842 *Sci U S A* 111, E1374-1382.
- 843 Lavdas, A.A., Grigoriou, M., Pachnis, V., and Parnavelas, J.G. (1999). The medial ganglionic eminence  
844 gives rise to a population of early neurons in the developing cerebral cortex. *J Neurosci* 19, 7881-7888.
- 845 Li, X., Newbern, J., Wu, Y., Morgan-Smith, M., Zhong, J., Charron, J., and Snider, W. (2012). MEK Is a  
846 Key Regulator of Gliogenesis in the Developing Brain. *Neuron* 75, 1035-1050.
- 847 Lim, L., Mi, D., Llorca, A., and Marín, O. (2018). Development and Functional Diversification of Cortical  
848 Interneurons. *Neuron* 100, 294-313.

849 Madisen, L., Zwingman, T.A., Sunkin, S.M., Oh, S.W., Zariwala, H.A., Gu, H., Ng, L.L., Palmiter, R.D.,  
850 Hawrylycz, M.J., Jones, A.R., et al. (2010). A robust and high-throughput Cre reporting and  
851 characterization system for the whole mouse brain. *Nat Neurosci* 13, 133-140.

852 Mardinly, A.R., Spiegel, I., Patrizi, A., Centofante, E., Bazinet, J.E., Tzeng, C.P., Mandel-Brehm, C.,  
853 Harmin, D.A., Adesnik, H., Fagiolini, M., et al. (2016). Sensory experience regulates cortical inhibition  
854 by inducing IGF1 in VIP neurons. *Nature* 531, 371-375.

855 Marin, O., and Rubenstein, J. (2001). A long, remarkable journey: Tangential migration in the  
856 telencephalon. *Nature Reviews Neuroscience* 2, 780-790.

857 Marin, O., and Rubenstein, J. (2003). Cell migration in the forebrain. *Annual Review of Neuroscience* 26,  
858 441-483.

859 Martin, P., and Pognonec, P. (2010). ERK and cell death: cadmium toxicity, sustained ERK activation and  
860 cell death. *FEBS J* 277, 39-46.

861 Mattar, P., Langevin, L.M., Markham, K., Klenin, N., Shivji, S., Zinyk, D., and Schuurmans, C. (2008).  
862 Basic helix-loop-helix transcription factors cooperate to specify a cortical projection neuron identity.  
863 *Mol Cell Biol* 28, 1456-1469.

864 Mayer, C., Hafemeister, C., Bandler, R.C., Machold, R., Batista Brito, R., Jaglin, X., Allaway, K., Butler,  
865 A., Fishell, G., and Satija, R. (2018). Developmental diversification of cortical inhibitory interneurons.  
866 *Nature* 555, 457-462.

867 McCormick, D.A., Connors, B.W., Lighthall, J.W., Prince, D.A. (1985) Comparative electrophysiology of  
868 pyramidal and sparsely spiny stellate neurons of the neocortex. *J Neurophysiol.* 54:782-806.

869 Mi, D., Li, Z., Lim, L., Li, M., Moissidis, M., Yang, Y., Gao, T., Hu, T.X., Pratt, T., Price, D.J., et al.  
870 (2018). Early emergence of cortical interneuron diversity in the mouse embryo. *Science* 360, 81-85.

871 Miguel, C.S., Chaim-Avancini, T.M., Silva, M.A., and Louzã, M.R. (2015). Neurofibromatosis type 1 and  
872 attention deficit hyperactivity disorder: a case study and literature review. *Neuropsychiatr Dis Treat* 11,  
873 815-821.

874 Monory, K., Massa, F., Egertová, M., Eder, M., Blaudzun, H., Westenbroek, R., Kelsch, W., Jacob, W.,  
875 Marsch, R., Ekker, M., et al. (2006). The endocannabinoid system controls key epileptogenic circuits  
876 in the hippocampus. *Neuron* 51, 455-466.

877 Morishita, H., Cabungcal, J., Chen, Y., Do, K., and Hensch, T. (2015). Prolonged Period of Cortical  
878 Plasticity upon Redox Dysregulation in Fast-Spiking Interneurons. *Biological Psychiatry* 78, 396-402.

879 Nateri, A.S., Raivich, G., Gebhardt, C., Da Costa, C., Naumann, H., Vreugdenhil, M., Makwana, M.,  
880 Brandner, S., Adams, R.H., Jefferys, J.G., et al. (2007). ERK activation causes epilepsy by stimulating  
881 NMDA receptor activity. *EMBO J* 26, 4891-4901.

882 Nichols, J., Bjorklund, G.R., Newbern, J., and Anderson, T. (2018). Parvalbumin fast-spiking interneurons  
883 are selectively altered by paediatric traumatic brain injury. *J Physiol* 596, 1277-1293.

884 Okaty, B., Miller, M., Sugino, K., Hempel, C., and Nelson, S. (2009). Transcriptional and  
885 Electrophysiological Maturation of Neocortical Fast-Spiking GABAergic Interneurons. *Journal of*  
886 *Neuroscience* 29, 7040-7052.

887 Ozkan, E.D., Creson, T.K., Kramár, E.A., Rojas, C., Seese, R.R., Babyan, A.H., Shi, Y., Lucero, R., Xu,  
888 X., Noebels, J.L., et al. (2014). Reduced cognition in *Syngap1* mutants is caused by isolated damage  
889 within developing forebrain excitatory neurons. *Neuron* 82, 1317-1333.

890 Paluszkiwicz, S.M., Martin, B.S., and Huntsman, M.M. (2011). Fragile X syndrome: the GABAergic  
891 system and circuit dysfunction. *Dev Neurosci* 33, 349-364.

892 Parnavelas, J.G. (2000). The origin and migration of cortical neurones: new vistas. *Trends Neurosci* 23,  
893 126-131.

894 Paul, A., Crow, M., Raudales, R., He, M., Gillis, J., and Huang, Z.J. (2017). Transcriptional Architecture  
895 of Synaptic Communication Delineates GABAergic Neuron Identity. *Cell* 171, 522-539.e520.

896 Perrinjaquet, M., Sjostrand, D., Moliner, A., Zechel, S., Lamballe, F., Maina, F., and Ibanez, C. (2011).  
897 MET signaling in GABAergic neuronal precursors of the medial ganglionic eminence restricts GDNF  
898 activity in cells that express GFR alpha 1 and a new transmembrane receptor partner. *Journal of Cell*  
899 *Science* 124, 2797-2805.

- 900 Pham, T.A., Graham, S.J., Suzuki, S., Barco, A., Kandel, E.R., Gordon, B., and Lickey, M.E. (2004). A  
901 semi-persistent adult ocular dominance plasticity in visual cortex is stabilized by activated CREB.  
902 *Learn Mem* 11, 738-747.
- 903 Pierpont, E., Hudock, R., Foy, A., Semrud-Clikeman, M., Pierpont, M., Berry, S., Shanley, R., Rubin, N.,  
904 Sommer, K., and Moertel, C. (2018). Social skills in children with RASopathies: a comparison of  
905 Noonan syndrome and neurofibromatosis type 1. *Journal of Neurodevelopmental Disorders* 10.
- 906 Pierpont, E., Tworog-Dube, E., and Roberts, A. (2015). Attention skills and executive functioning in  
907 children with Noonan syndrome and their unaffected siblings. *Developmental Medicine and Child*  
908 *Neurology* 57, 385-392.
- 909 Pizzorusso, T., Medini, P., Berardi, N., Chierzi, S., Fawcett, J.W., and Maffei, L. (2002). Reactivation of  
910 ocular dominance plasticity in the adult visual cortex. *Science* 298, 1248-1251.
- 911 Pozas, E., and Ibanez, C. (2005). GDNF and GFR alpha 1 promote differentiation and tangential migration  
912 of cortical GABAergic neurons. *Neuron* 45, 701-713.
- 913 Pucilowska, J., Puzerey, P., Karlo, J., Galan, R., and Landreth, G. (2012). Disrupted ERK Signaling during  
914 Cortical Development Leads to Abnormal Progenitor Proliferation, Neuronal and Network Excitability  
915 and Behavior, Modeling Human Neuro-Cardio-Facial-Cutaneous and Related Syndromes. *Journal of*  
916 *Neuroscience* 32, 8663-8677.
- 917 Pucilowska, J., Vithayathil, J., Pagani, M., Kelly, C., Karlo, J.C., Robol, C., Morella, I., Gozzi, A.,  
918 Brambilla, R., and Landreth, G.E. (2018). Pharmacological Inhibition of ERK Signaling Rescues  
919 Pathophysiology and Behavioral Phenotype Associated with 16p11.2 Chromosomal Deletion in Mice.  
920 *J Neurosci* 38, 6640-6652.
- 921 Pucilowska, J., Vithayathil, J., Tavares, E., Kelly, C., Karlo, J., and Landreth, G. (2015). The 16p11.2  
922 Deletion Mouse Model of Autism Exhibits Altered Cortical Progenitor Proliferation and Brain  
923 Cytoarchitecture Linked to the ERK MAPK Pathway. *Journal of Neuroscience* 35, 3190-3200.
- 924 Rauen, K., Chakravarti, A., and Green, E. (2013). The RASopathies. *Annual Review of Genomics and*  
925 *Human Genetics*, Vol 14 14, 355-369.

- 926 Rojas-Leguizamón, M., Baroja, J.L., Sanabria, F., and Orduña, V. (2018). Response-inhibition capacity in  
927 spontaneously hypertensive and Wistar rats: acquisition of fixed minimum interval performance and  
928 responsiveness to D-amphetamine. *Behav Pharmacol* 29, 668-675.
- 929 Rosato-Siri, M., Zambello, E., Mutinelli, C., Garbati, N., Benedetti, R., Aldegheri, L., Graziani, F.,  
930 Virginio, C., Alvaro, G., and Large, C. (2015). A Novel Modulator of Kv3 Potassium Channels  
931 Regulates the Firing of Parvalbumin-Positive Cortical Interneurons. *Journal of Pharmacology and*  
932 *Experimental Therapeutics* 354, 251-260.
- 933 Rudy, B., Fishell, G., Lee, S., and Hjerling-Leffler, J. (2011). Three groups of interneurons account for  
934 nearly 100% of neocortical GABAergic neurons. *Dev Neurobiol* 71, 45-61.
- 935 Rudy, B., and McBain, C. (2001). Kv3 channels: voltage-gated K<sup>+</sup> channels designed for high-frequency  
936 repetitive firing. *Trends in Neurosciences* 24, 517-526.
- 937 Samuels, I., Saitta, S., and Landreth, G. (2009). MAP'ing CNS Development and Cognition: An ERKsome  
938 Process. *Neuron* 61, 160-167.
- 939 Sandberg, M., Taher, L., Hu, J., Black, B.L., Nord, A.S., and Rubenstein, J.L.R. (2018). Genomic analysis  
940 of transcriptional networks directing progression of cell states during MGE development. *Neural Dev*  
941 13, 21.
- 942 Seidman, L.J., Valera, E.M., Makris, N., Monuteaux, M.C., Boriel, D.L., Kelkar, K., Kennedy, D.N.,  
943 Caviness, V.S., Bush, G., Alvardi, M., et al. (2006). Dorsolateral prefrontal and anterior cingulate cortex  
944 volumetric abnormalities in adults with attention-deficit/hyperactivity disorder identified by magnetic  
945 resonance imaging. *Biol Psychiatry* 60, 1071-1080.
- 946 Selby, L., Zhang, C., and Sun, Q.Q. (2007). Major defects in neocortical GABAergic inhibitory circuits in  
947 mice lacking the fragile X mental retardation protein. *Neurosci Lett* 412, 227-232.
- 948 Sorg, B.A., Berretta, S., Blacktop, J.M., Fawcett, J.W., Kitagawa, H., Kwok, J.C., and Miquel, M. (2016).  
949 Casting a Wide Net: Role of Perineuronal Nets in Neural Plasticity. *J Neurosci* 36, 11459-11468.



950 Southwell, D., Paredes, M., Galvao, R., Jones, D., Froemke, R., Sebe, J., Alfaro-Cervello, C., Tang, Y.,  
951 Garcia-Verdugo, J., Rubenstein, J., et al. (2012). Intrinsically determined cell death of developing  
952 cortical interneurons. *Nature* 491, 109-U172.

953 Stanco, A., Pla, R., Vogt, D., Chen, Y., Mandal, S., Walker, J., Hunt, R., Lindtner, S., Erdman, C., Pieper,  
954 A., et al. (2014). NPAS1 Represses the Generation of Specific Subtypes of Cortical Interneurons.  
955 *Neuron* 84, 940-953.

956 Steullet, P., Cabungcal, J.H., Coyle, J., Didriksen, M., Gill, K., Grace, A.A., Hensch, T.K., LaMantia, A.S.,  
957 Lindemann, L., Maynard, T.M., et al. (2017). Oxidative stress-driven parvalbumin interneuron  
958 impairment as a common mechanism in models of schizophrenia. *Mol Psychiatry* 22, 936-943.

959 Steward, O., Torre, E., Tomasulo, R., and Lothman, E. (1992). Seizures and the Regulation of Astroglial  
960 Gene Expression. *Epilepsy Research*, 197-209.

961 Stringer, J. (1996). Repeated seizures increase GFAP and vimentin in the hippocampus. *Brain Research*  
962 717, 147-153.

963 Suzuki, S., al-Noori, S., Butt, S.A., and Pham, T.A. (2004). Regulation of the CREB signaling cascade in  
964 the visual cortex by visual experience and neuronal activity. *J Comp Neurol* 479, 70-83.

965 Tamamaki, N., Fujimori, K.E., and Takauji, R. (1997). Origin and route of tangentially migrating neurons  
966 in the developing neocortical intermediate zone. *J Neurosci* 17, 8313-8323.

967 Tidyman, W., and Rauen, K. (2016). Pathogenetics of the RASopathies. *Human Molecular Genetics* 25,  
968 R123-R132.

969 Tyssowski, K.M., DeStefino, N.R., Cho, J.H., Dunn, C.J., Poston, R.G., Carty, C.E., Jones, R.D., Chang,  
970 S.M., Romeo, P., Wurzelmann, M.K., et al. (2018). Different Neuronal Activity Patterns Induce  
971 Different Gene Expression Programs. *Neuron* 98, 530-546.e511.

972 Ure, K., Lu, H., Wang, W., Ito-Ishida, A., Wu, Z., He, L.J., Sztainberg, Y., Chen, W., Tang, J., and Zoghbi,  
973 H.Y. (2016). Restoration of *Mecp2* expression in GABAergic neurons is sufficient to rescue multiple  
974 disease features in a mouse model of Rett syndrome. *Elife* 5.

- 975 Vong, L., Ye, C., Yang, Z., Choi, B., Chua, S., and Lowell, B.B. (2011). Leptin action on GABAergic  
976 neurons prevents obesity and reduces inhibitory tone to POMC neurons. *Neuron* 71, 142-154.
- 977 Vorstman, J.A., Staal, W.G., van Daalen, E., van Engeland, H., Hochstenbach, P.F., and Franke, L. (2006).  
978 Identification of novel autism candidate regions through analysis of reported cytogenetic abnormalities  
979 associated with autism. *Mol Psychiatry* 11, 1, 18-28.
- 980 Walsh, K.S., Vélez, J.I., Kardel, P.G., Imas, D.M., Muenke, M., Packer, R.J., Castellanos, F.X., and Acosta,  
981 M.T. (2013). Symptomatology of autism spectrum disorder in a population with neurofibromatosis type  
982 1. *Dev Med Child Neurol* 55, 131-138.
- 983 Watterson, E., Mazur, G.J., and Sanabria, F. (2015). Validation of a method to assess ADHD-related  
984 impulsivity in animal models. *J Neurosci Methods* 252, 36-47.
- 985 Wichterle, H., Garcia-Verdugo, J.M., Herrera, D.G., and Alvarez-Buylla, A. (1999). Young neurons from  
986 medial ganglionic eminence disperse in adult and embryonic brain. *Nat Neurosci* 2, 461-466.
- 987 Wichterle, H., Turnbull, D., Nery, S., Fishell, G., and Alvarez-Buylla, A. (2001). In utero fate mapping  
988 reveals distinct migratory pathways and fates of neurons born in the mammalian basal forebrain.  
989 *Development* 128, 3759-3771.
- 990 Wonders, C., and Anderson, S. (2006). The origin and specification of cortical interneurons. *Nature*  
991 *Reviews Neuroscience* 7, 687-696.
- 992 Xing, L., Larsen, R., Bjorklund, G., Li, X., Wu, Y., Philpot, B., Snider, W., and Newbern, J. (2016). Layer  
993 specific and general requirements for ERK/MAPK signaling in the developing neocortex. *Elife* 5.
- 994 Yoon, G., Rosenberg, J., Blaser, S., and Rauen, K. (2007). Neurological complications of cardio-facio-  
995 cutaneous syndrome. *Developmental Medicine and Child Neurology* 49, 894-899.
- 996 Zhang, Z.W., Zak, J.D., and Liu, H. (2010). MeCP2 is required for normal development of GABAergic  
997 circuits in the thalamus. *J Neurophysiol* 103, 2470-2481.

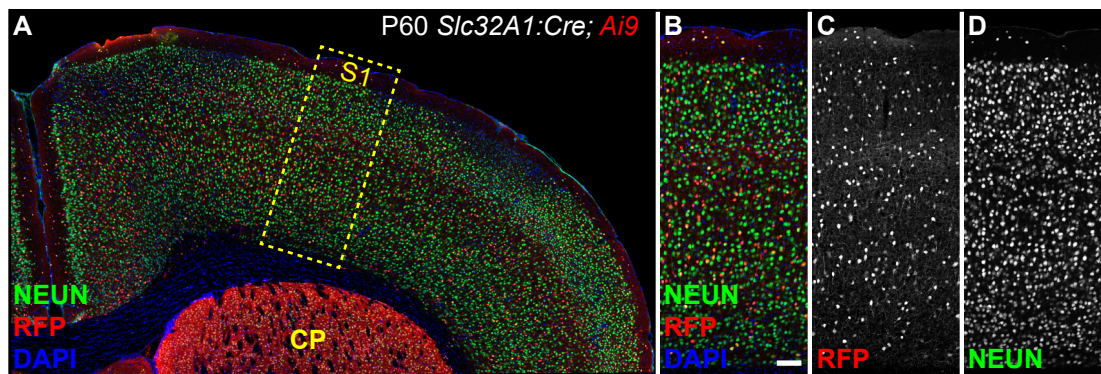

*Slc32A1:Cre; Ai9* S1 Layer II/III

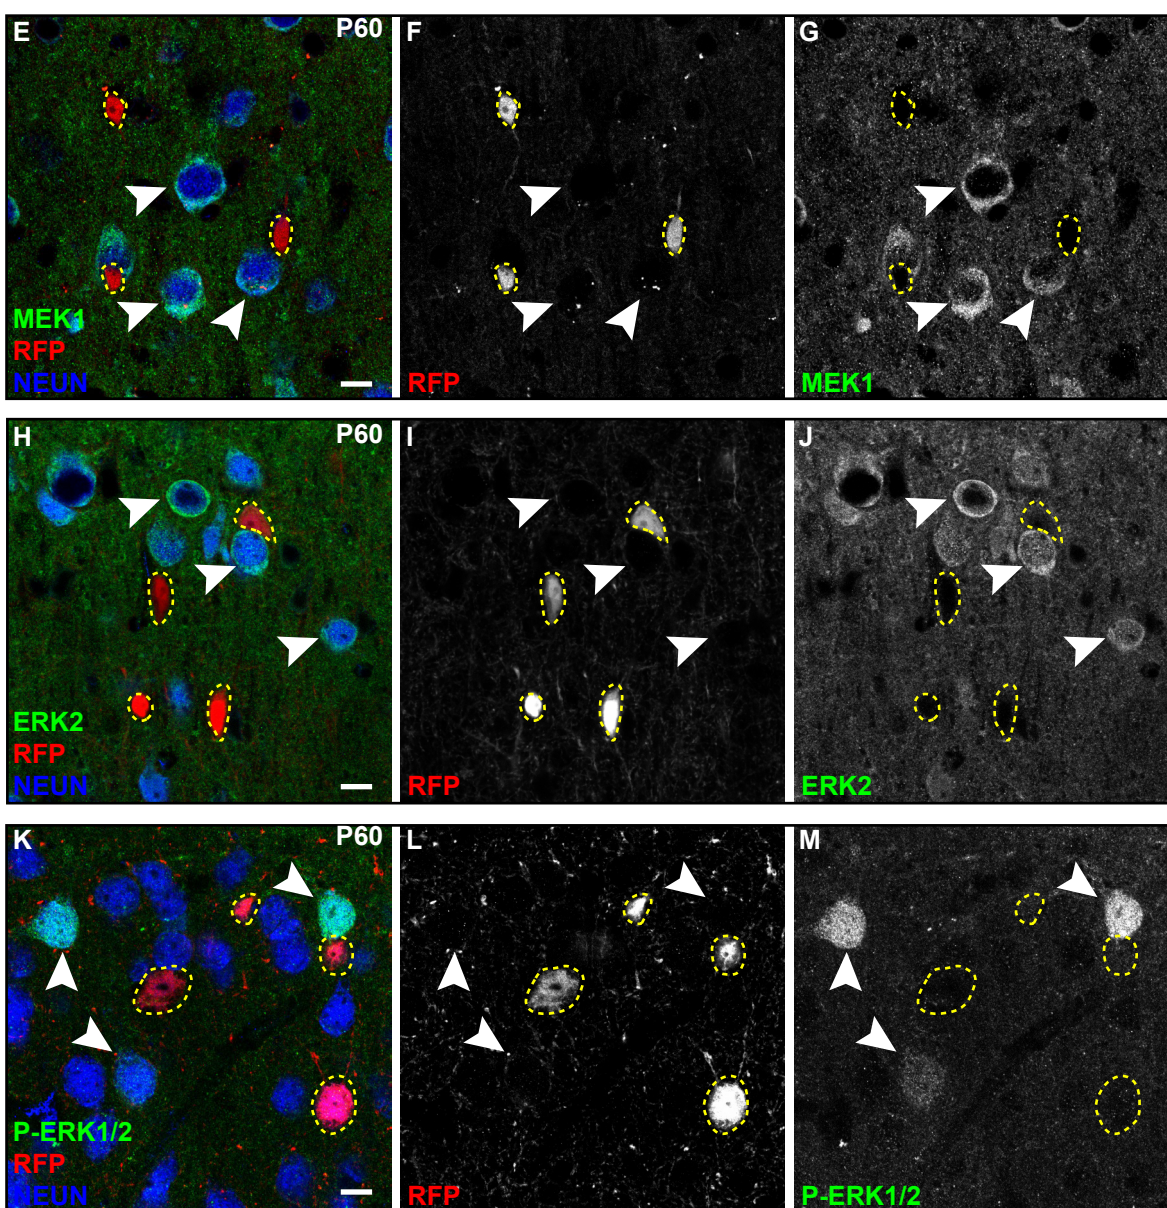

Primary Somatosensory Cortex

Figure 2

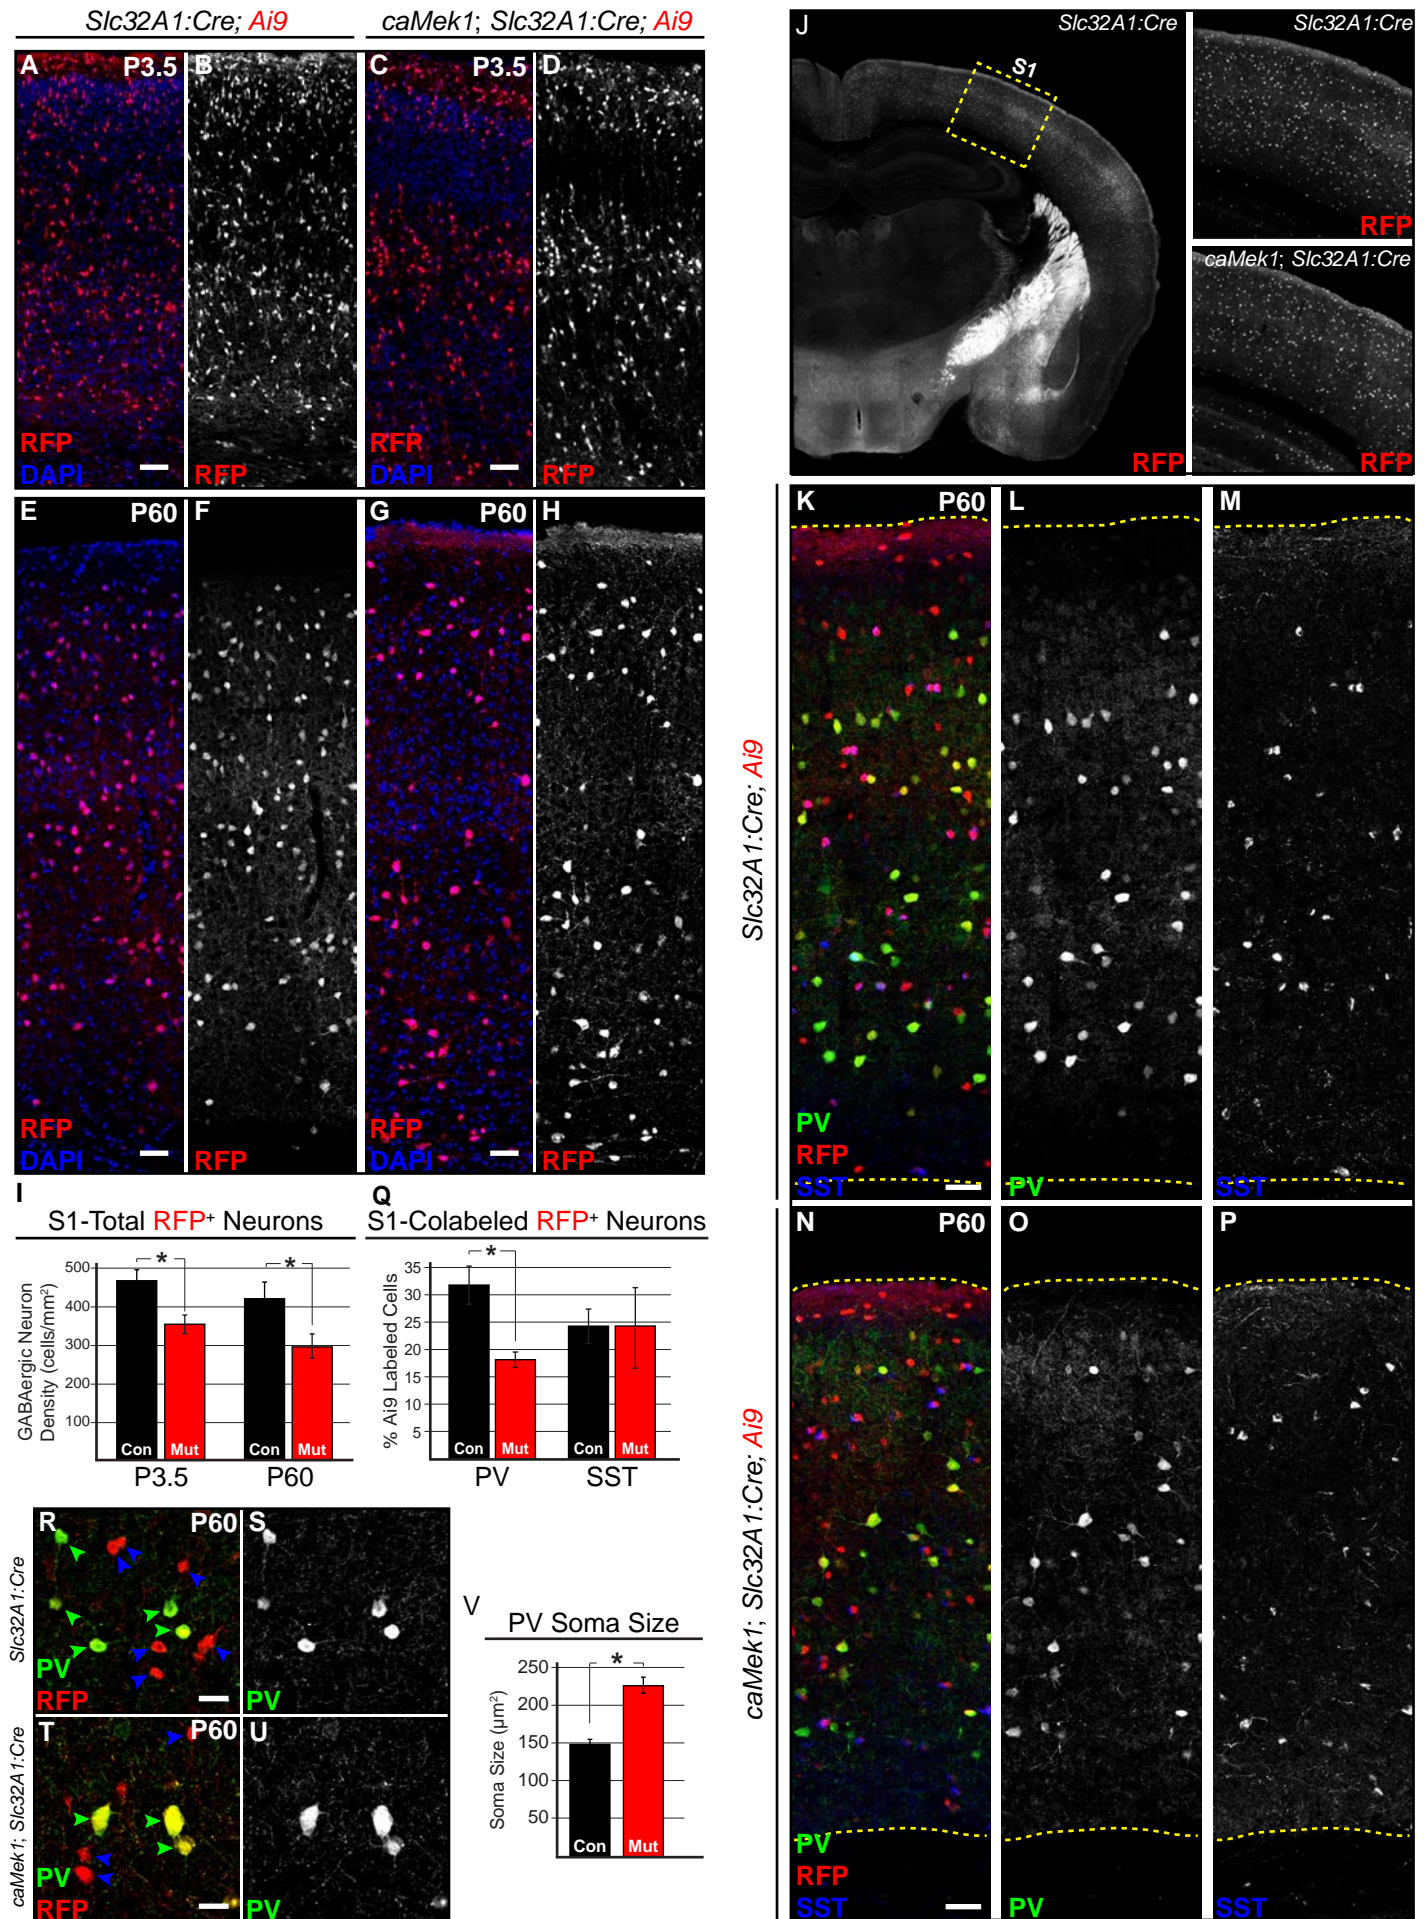

Figure 3

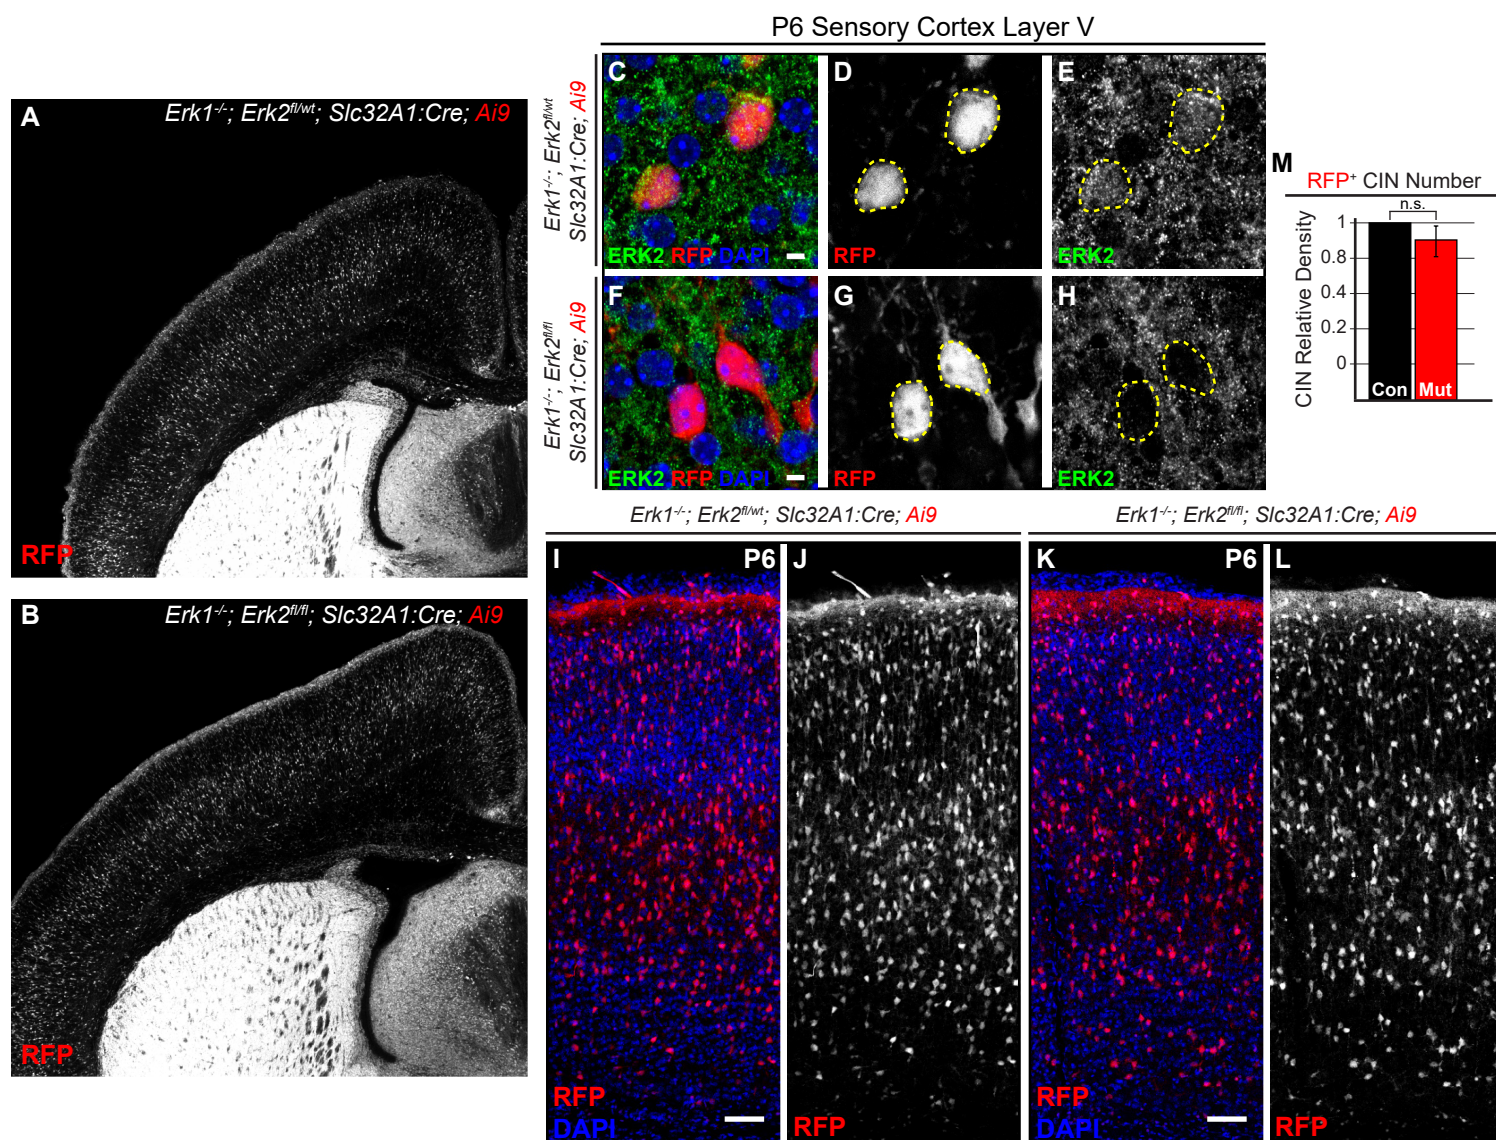

### E13.5 Ganglionic Eminences (GE)

Figure 4

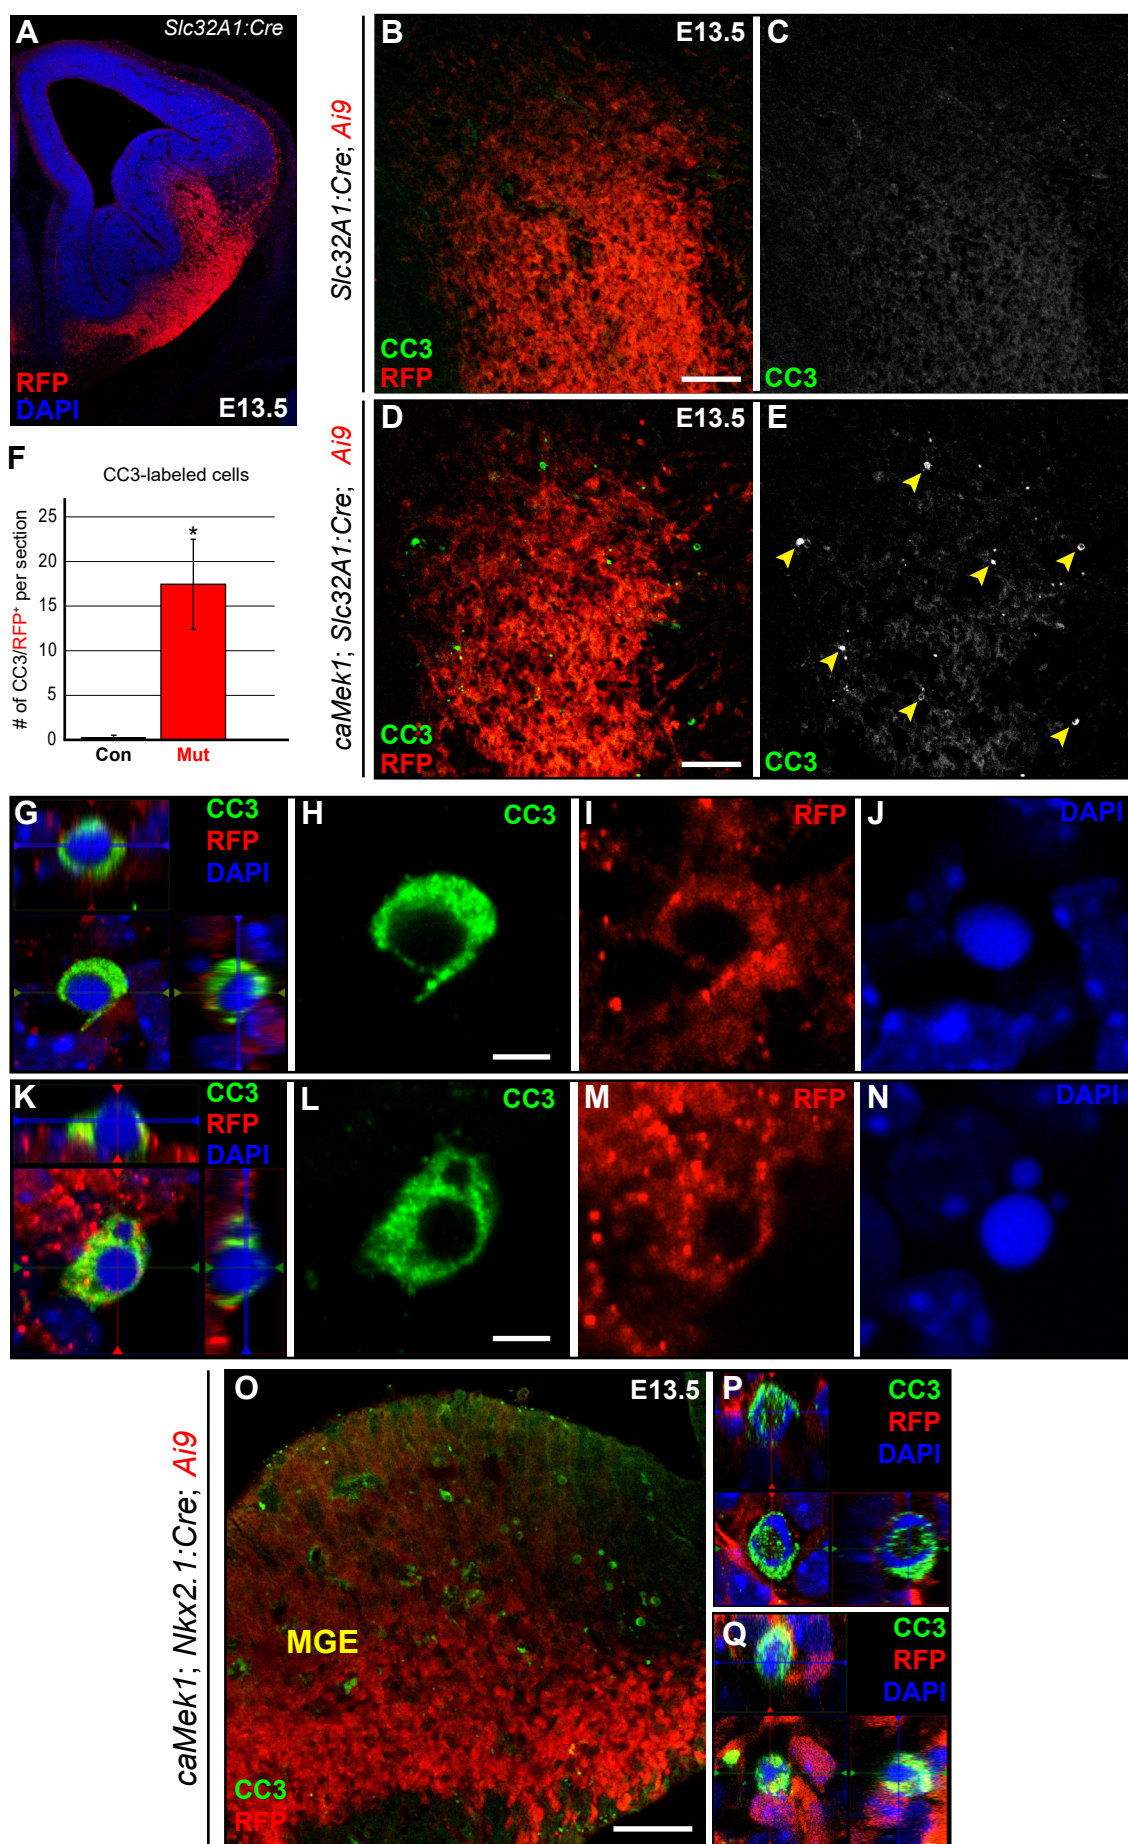

Figure 5

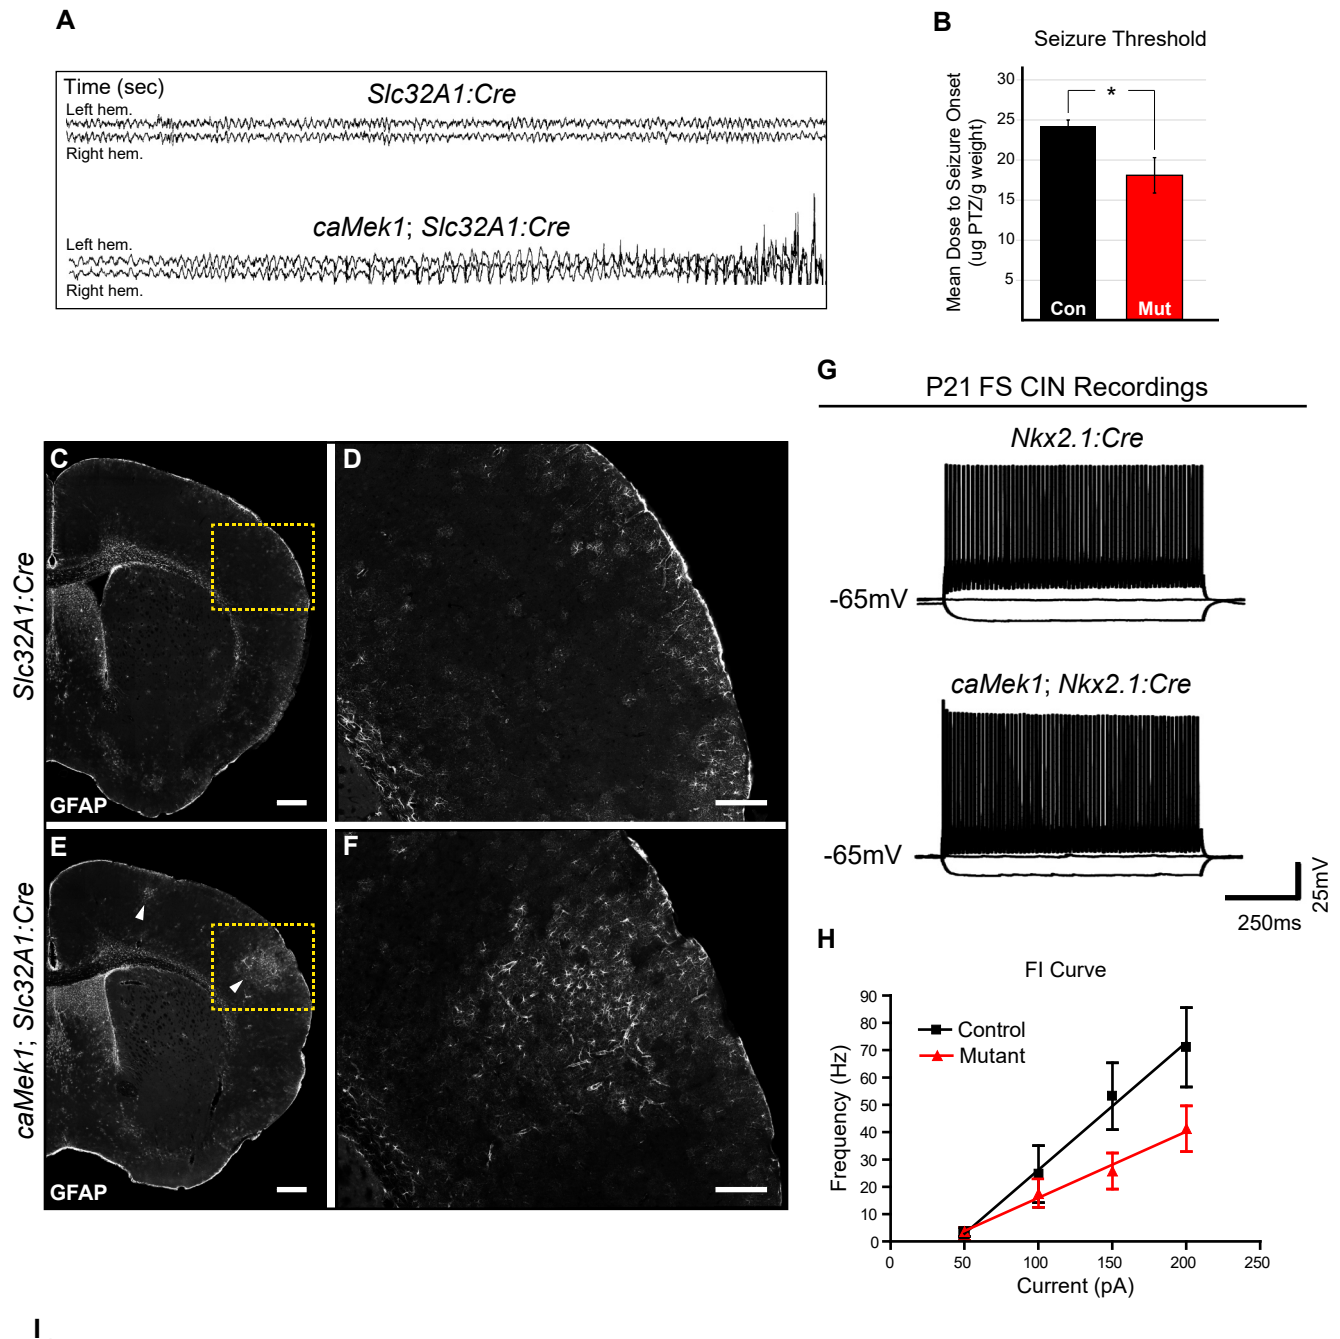

Layer II/III Pyramidal Neuron Perisomatic GABAergic Synapses

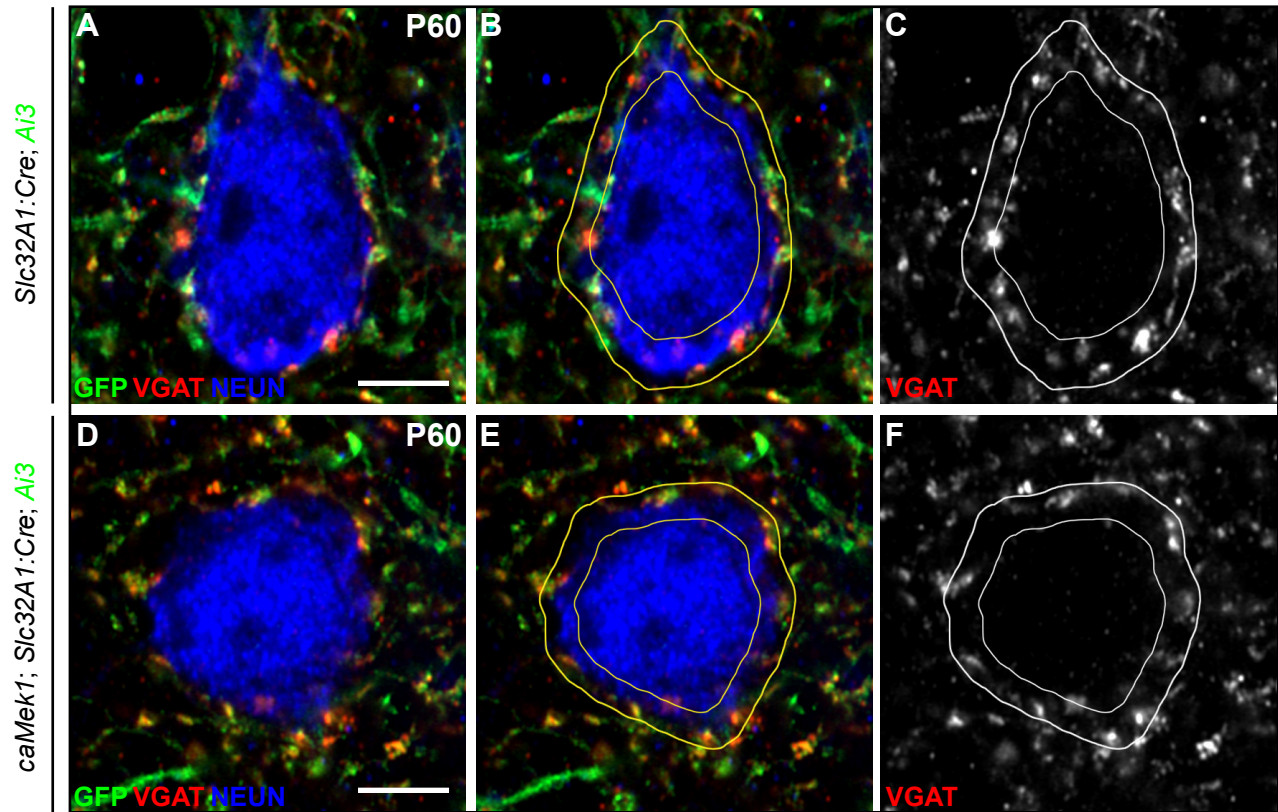

Neuropil GABAergic Synapses

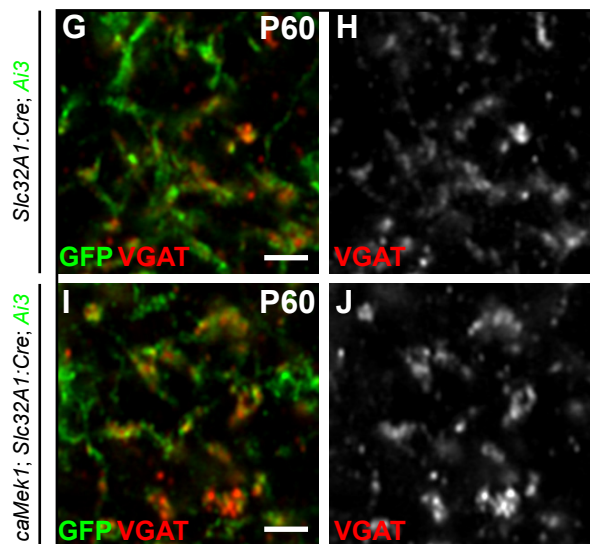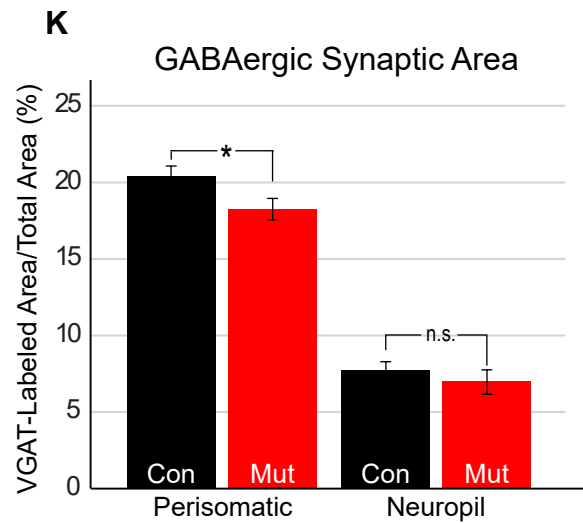



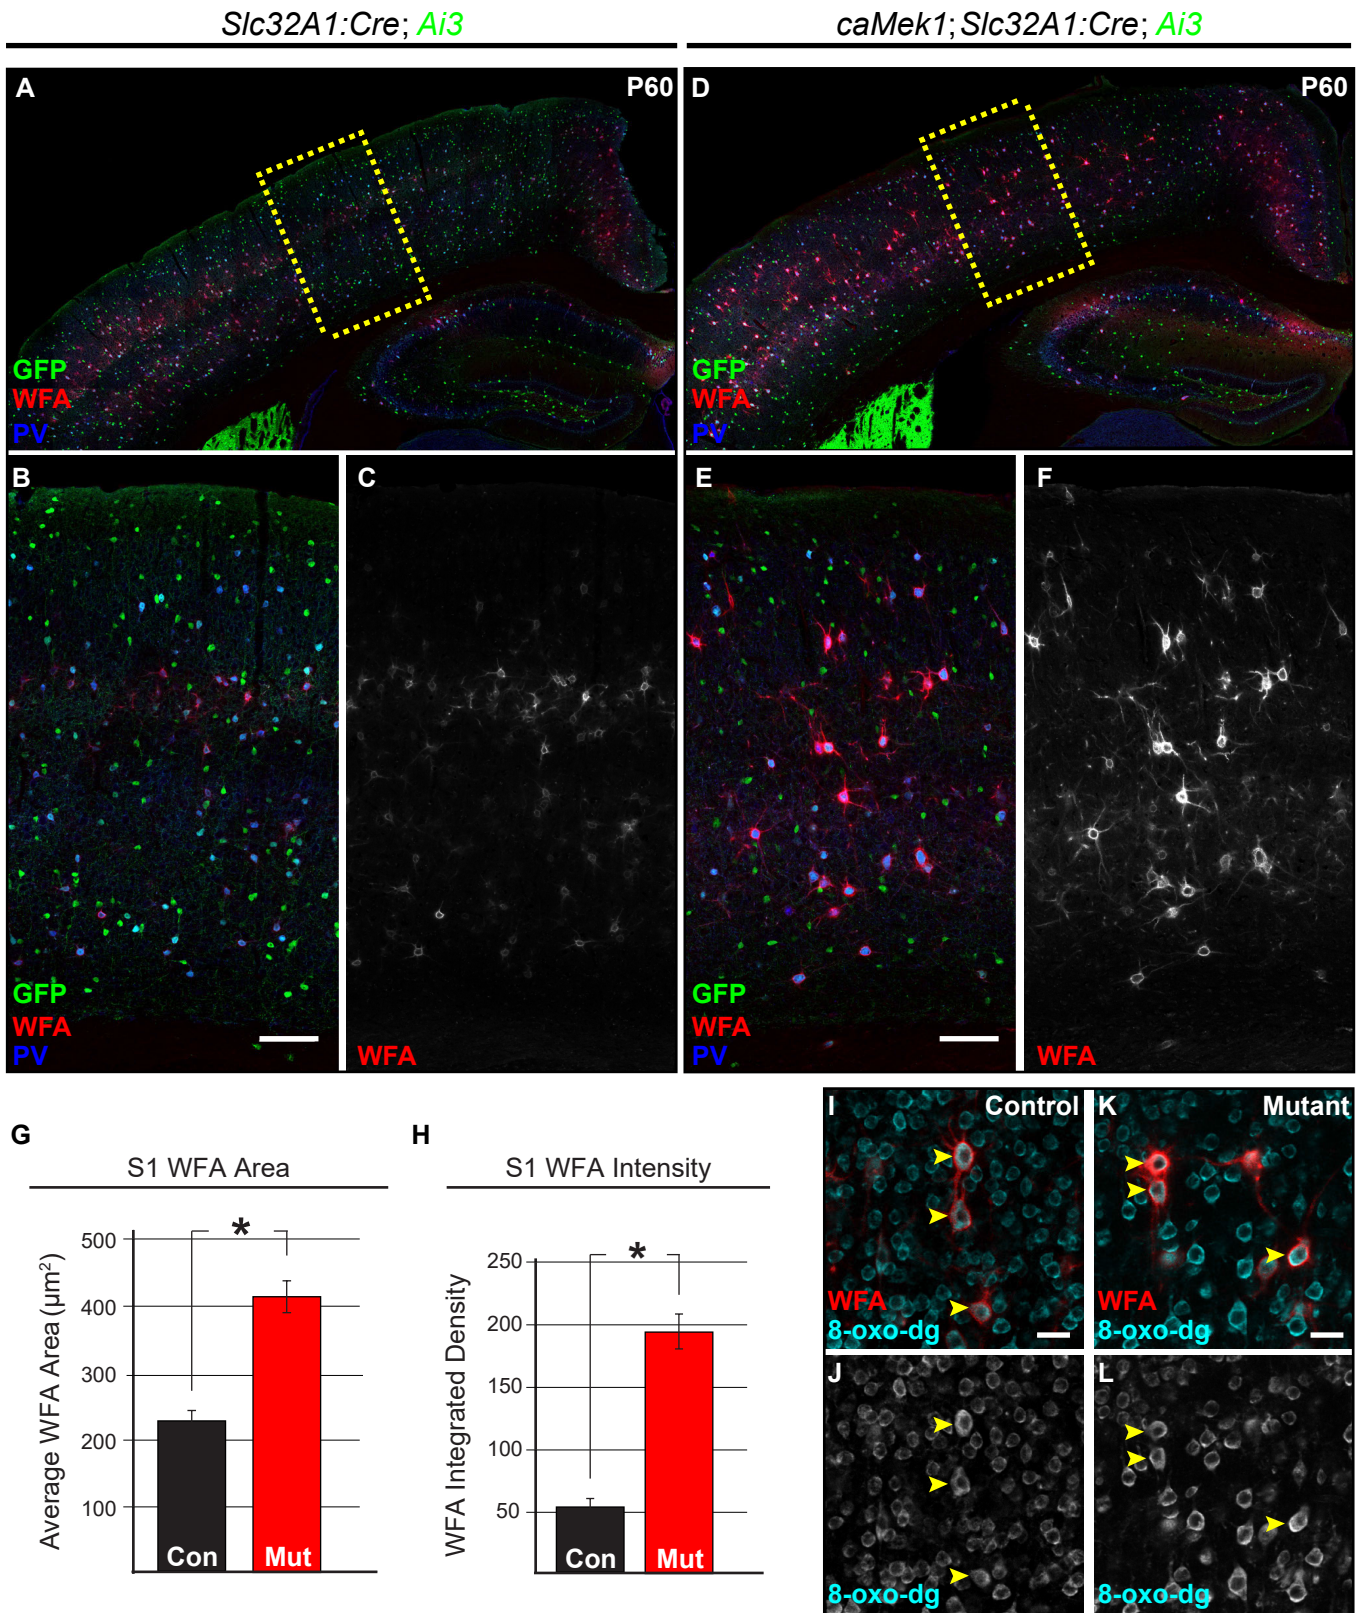

Figure 8

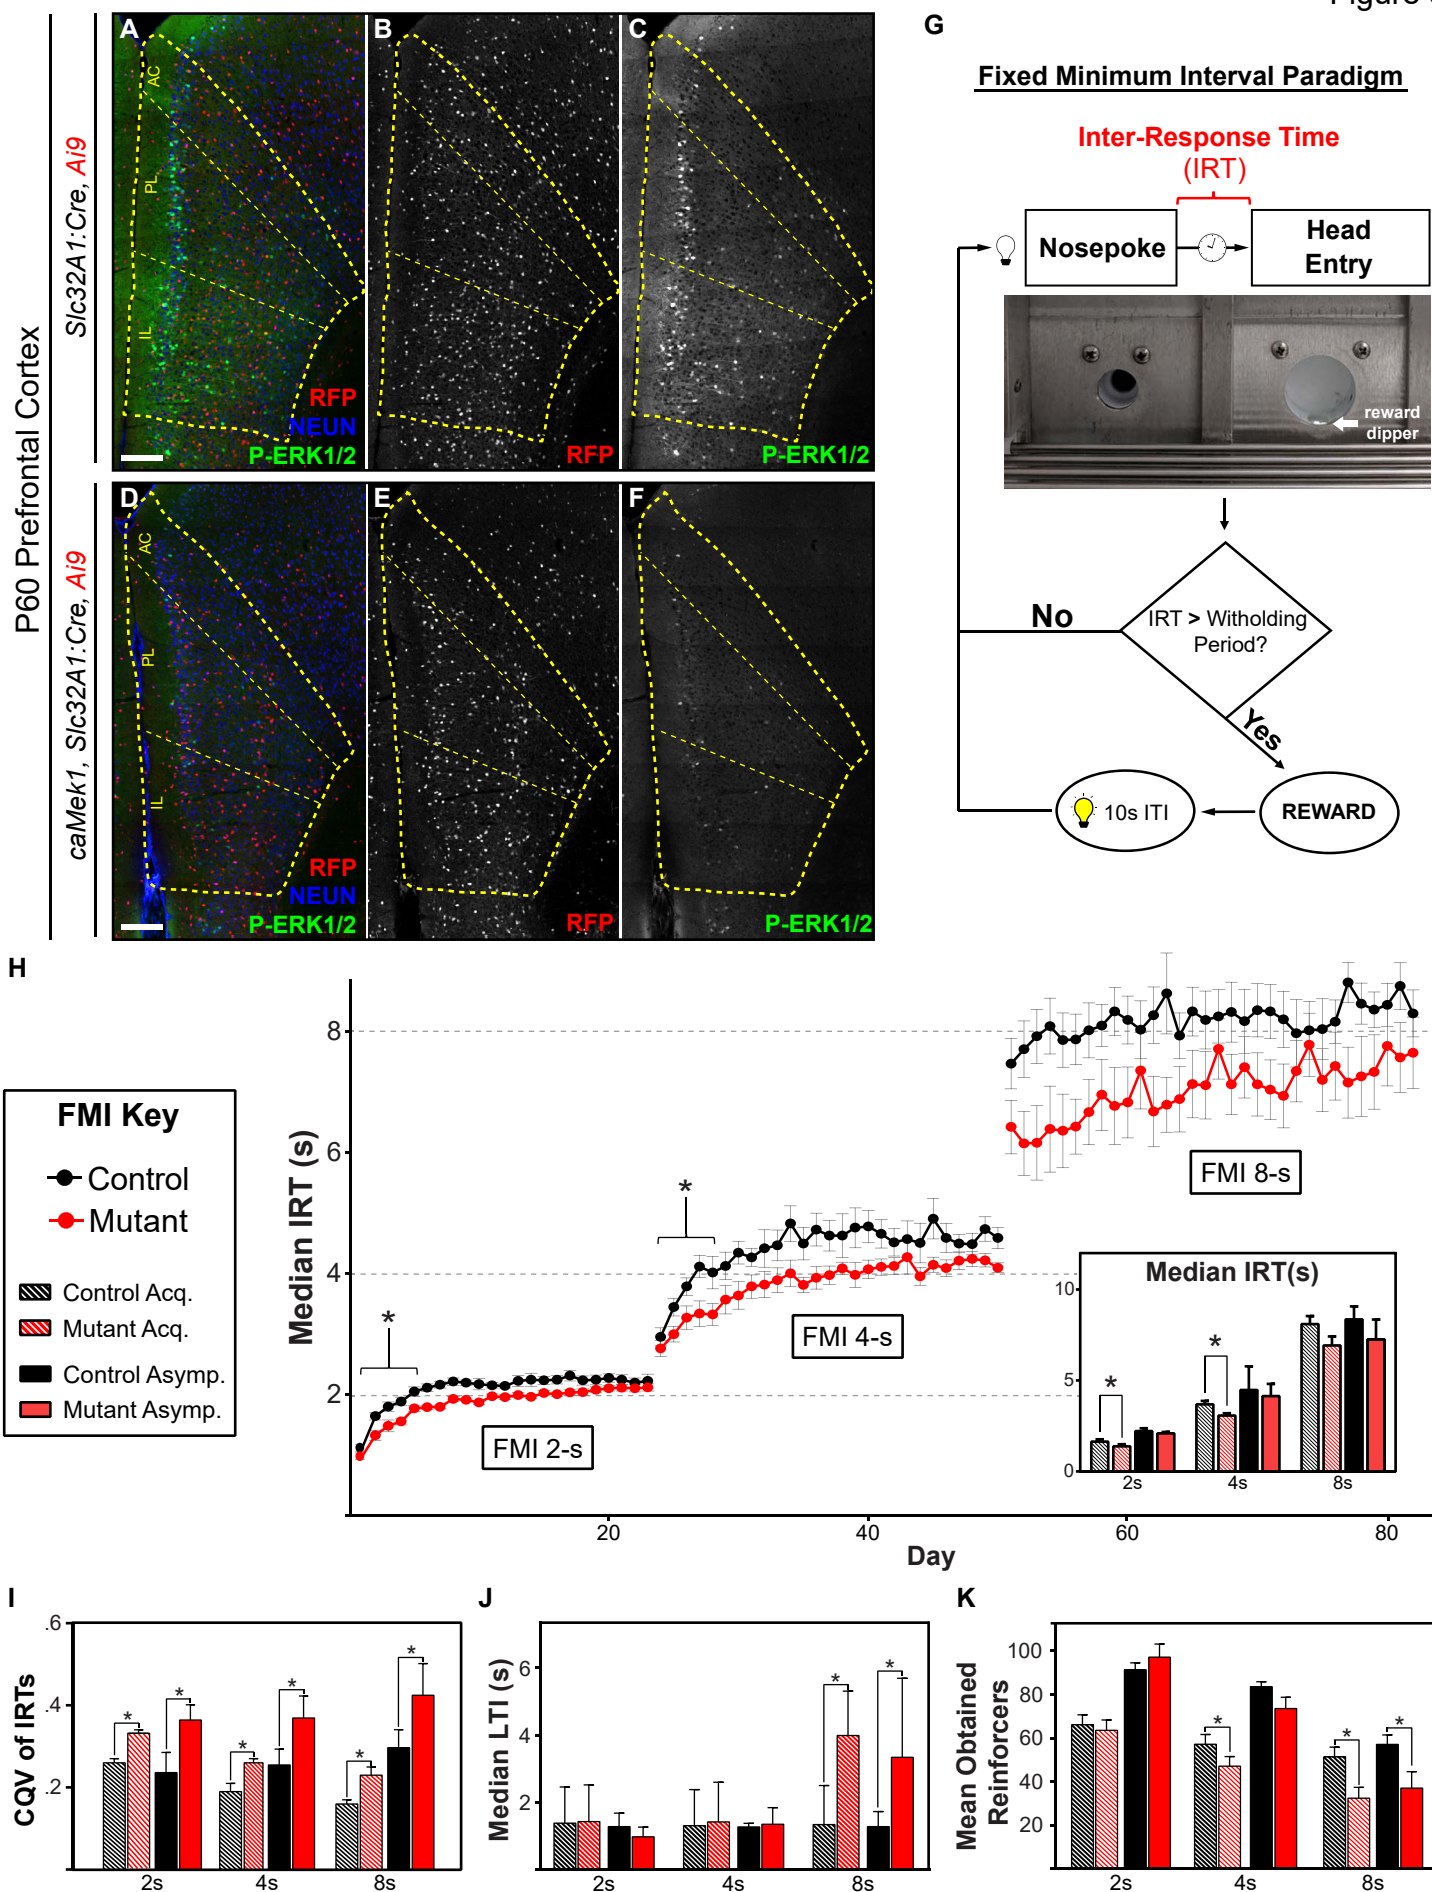

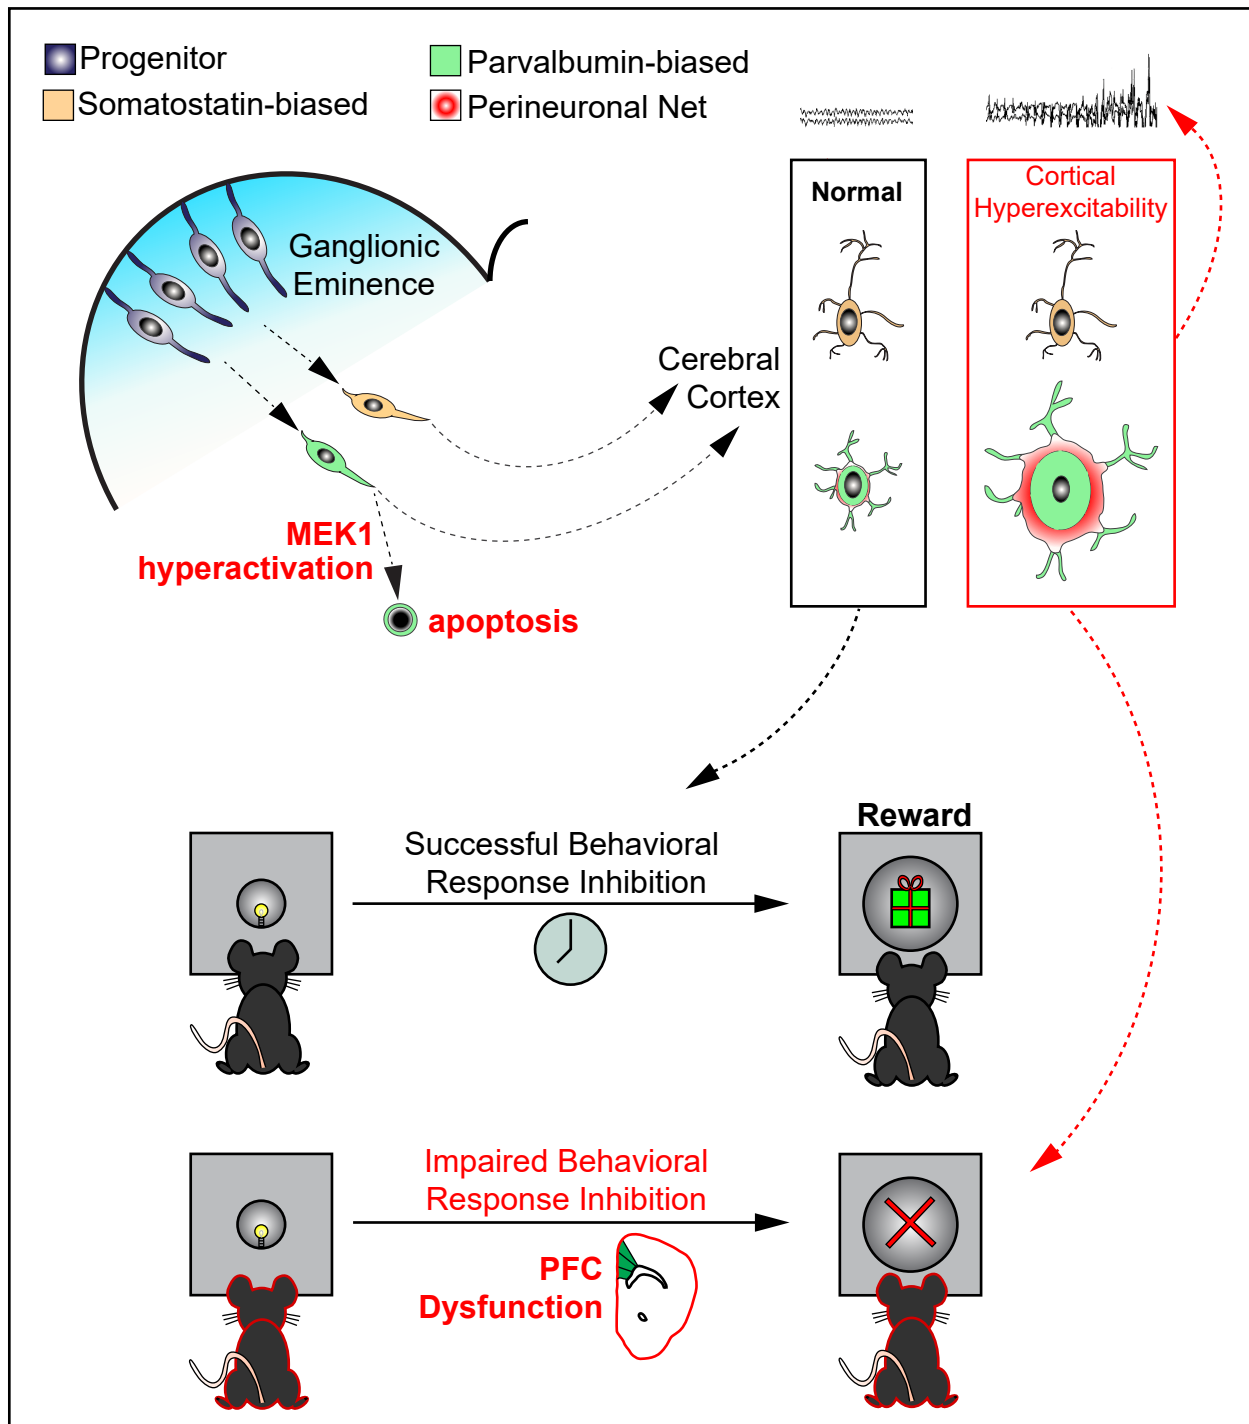

Source: https://www.biorxiv.org/content/10.1101/748087v1.full.pdf
